# Supplementary material
Source: publisher site journal article supplement (https://www.spandidos-publications.com/686/downloadSupplementary)
Supplement: Supplementary file 1 [file downloadSupplementary]

## Sheet: query2map
KEGG pathway analysis ACBP-OXA-treated MKN-45 cells protein functions query2map.
Protein_ID	KO	Name	Definition	Map_ID	Map_Name	URL
B1ALI9	K20910	TXNIP	thioredoxin-interacting protein	map04621	NOD-like receptor signaling pathway	http://www.kegg.jp/kegg-bin/show_pathway?map04621+K20910
Q8IZZ8	K03911	SERPINC1, AT3	antithrombin III	map04610	Complement and coagulation cascades	http://www.kegg.jp/kegg-bin/show_pathway?map04610+K03911
B7Z8Q4	K18977	HPX	hemopexin [EC:3.2.1.35;]
D6RBJ7	K12258	GC	vitamin D-binding protein
Q96RG4	K07187	IRS2	insulin receptor substrate 2	map04022	cGMP-PKG signaling pathway	http://www.kegg.jp/kegg-bin/show_pathway?map04022+K07187
Q96RG4	K07187	IRS2	insulin receptor substrate 2	map04068	FoxO signaling pathway	http://www.kegg.jp/kegg-bin/show_pathway?map04068+K07187
Q96RG4	K07187	IRS2	insulin receptor substrate 2	map04152	AMPK signaling pathway	http://www.kegg.jp/kegg-bin/show_pathway?map04152+K07187
Q96RG4	K07187	IRS2	insulin receptor substrate 2	map04211	Longevity regulating pathway	http://www.kegg.jp/kegg-bin/show_pathway?map04211+K07187
Q96RG4	K07187	IRS2	insulin receptor substrate 2	map04213	Longevity regulating pathway - multiple species	http://www.kegg.jp/kegg-bin/show_pathway?map04213+K07187
Q96RG4	K07187	IRS2	insulin receptor substrate 2	map04910	Insulin signaling pathway	http://www.kegg.jp/kegg-bin/show_pathway?map04910+K07187
Q96RG4	K07187	IRS2	insulin receptor substrate 2	map04920	Adipocytokine signaling pathway	http://www.kegg.jp/kegg-bin/show_pathway?map04920+K07187
Q96RG4	K07187	IRS2	insulin receptor substrate 2	map04923	Regulation of lipolysis in adipocytes	http://www.kegg.jp/kegg-bin/show_pathway?map04923+K07187
Q96RG4	K07187	IRS2	insulin receptor substrate 2	map04930	Type II diabetes mellitus	http://www.kegg.jp/kegg-bin/show_pathway?map04930+K07187
Q96RG4	K07187	IRS2	insulin receptor substrate 2	map04931	Insulin resistance	http://www.kegg.jp/kegg-bin/show_pathway?map04931+K07187
Q96RG4	K07187	IRS2	insulin receptor substrate 2	map04932	Non-alcoholic fatty liver disease (NAFLD)	http://www.kegg.jp/kegg-bin/show_pathway?map04932+K07187
Q96RG4	K07187	IRS2	insulin receptor substrate 2	map05206	MicroRNAs in cancer	http://www.kegg.jp/kegg-bin/show_pathway?map05206+K07187
Q6IAM0	K03248	EIF3G	translation initiation factor 3 subunit G	map03013	RNA transport	http://www.kegg.jp/kegg-bin/show_pathway?map03013+K03248
H0YNP9	K01139	spoT, HDDC3	guanosine-3',5'-bis(diphosphate) 3'-pyrophosphohydrolase [EC:3.1.7.2;]	map00230	Purine metabolism	http://www.kegg.jp/kegg-bin/show_pathway?map00230+K01139
E5RJK7
A8MW49	K08750	FABP1, L-FABP	fatty acid-binding protein 1, liver	map03320	PPAR signaling pathway	http://www.kegg.jp/kegg-bin/show_pathway?map03320+K08750
A8MW49	K08750	FABP1, L-FABP	fatty acid-binding protein 1, liver	map04975	Fat digestion and absorption	http://www.kegg.jp/kegg-bin/show_pathway?map04975+K08750
Q99988	K05504	GDF15	growth differentiation factor 15
K7ER90
Q9BWT3	K14376	PAP	poly(A) polymerase [EC:2.7.7.19;]	map03015	mRNA surveillance pathway	http://www.kegg.jp/kegg-bin/show_pathway?map03015+K14376
A0A087WVA8
Q8TB52	K10307	FBXO30	F-box protein 30
Q7Z6E9	K10624	RBBP6	E3 ubiquitin-protein ligase RBBP6 [EC:2.3.2.27;]
B4DUP5
Q9P1Y5	K17493	CAMSAP	calmodulin-regulated spectrin-associated protein
B3KRB7	K07209	IKBKB, IKKB	inhibitor of nuclear factor kappa-B kinase subunit beta [EC:2.7.11.10;]	map01523	Antifolate resistance	http://www.kegg.jp/kegg-bin/show_pathway?map01523+K07209
B3KRB7	K07209	IKBKB, IKKB	inhibitor of nuclear factor kappa-B kinase subunit beta [EC:2.7.11.10;]	map04010	MAPK signaling pathway	http://www.kegg.jp/kegg-bin/show_pathway?map04010+K07209
B3KRB7	K07209	IKBKB, IKKB	inhibitor of nuclear factor kappa-B kinase subunit beta [EC:2.7.11.10;]	map04014	Ras signaling pathway	http://www.kegg.jp/kegg-bin/show_pathway?map04014+K07209
B3KRB7	K07209	IKBKB, IKKB	inhibitor of nuclear factor kappa-B kinase subunit beta [EC:2.7.11.10;]	map04062	Chemokine signaling pathway	http://www.kegg.jp/kegg-bin/show_pathway?map04062+K07209
B3KRB7	K07209	IKBKB, IKKB	inhibitor of nuclear factor kappa-B kinase subunit beta [EC:2.7.11.10;]	map04064	NF-kappa B signaling pathway	http://www.kegg.jp/kegg-bin/show_pathway?map04064+K07209
B3KRB7	K07209	IKBKB, IKKB	inhibitor of nuclear factor kappa-B kinase subunit beta [EC:2.7.11.10;]	map04068	FoxO signaling pathway	http://www.kegg.jp/kegg-bin/show_pathway?map04068+K07209
B3KRB7	K07209	IKBKB, IKKB	inhibitor of nuclear factor kappa-B kinase subunit beta [EC:2.7.11.10;]	map04150	mTOR signaling pathway	http://www.kegg.jp/kegg-bin/show_pathway?map04150+K07209
B3KRB7	K07209	IKBKB, IKKB	inhibitor of nuclear factor kappa-B kinase subunit beta [EC:2.7.11.10;]	map04151	PI3K-Akt signaling pathway	http://www.kegg.jp/kegg-bin/show_pathway?map04151+K07209
B3KRB7	K07209	IKBKB, IKKB	inhibitor of nuclear factor kappa-B kinase subunit beta [EC:2.7.11.10;]	map04210	Apoptosis	http://www.kegg.jp/kegg-bin/show_pathway?map04210+K07209
B3KRB7	K07209	IKBKB, IKKB	inhibitor of nuclear factor kappa-B kinase subunit beta [EC:2.7.11.10;]	map04380	Osteoclast differentiation	http://www.kegg.jp/kegg-bin/show_pathway?map04380+K07209
B3KRB7	K07209	IKBKB, IKKB	inhibitor of nuclear factor kappa-B kinase subunit beta [EC:2.7.11.10;]	map04620	Toll-like receptor signaling pathway	http://www.kegg.jp/kegg-bin/show_pathway?map04620+K07209
B3KRB7	K07209	IKBKB, IKKB	inhibitor of nuclear factor kappa-B kinase subunit beta [EC:2.7.11.10;]	map04621	NOD-like receptor signaling pathway	http://www.kegg.jp/kegg-bin/show_pathway?map04621+K07209
B3KRB7	K07209	IKBKB, IKKB	inhibitor of nuclear factor kappa-B kinase subunit beta [EC:2.7.11.10;]	map04622	RIG-I-like receptor signaling pathway	http://www.kegg.jp/kegg-bin/show_pathway?map04622+K07209
B3KRB7	K07209	IKBKB, IKKB	inhibitor of nuclear factor kappa-B kinase subunit beta [EC:2.7.11.10;]	map04623	Cytosolic DNA-sensing pathway	http://www.kegg.jp/kegg-bin/show_pathway?map04623+K07209
B3KRB7	K07209	IKBKB, IKKB	inhibitor of nuclear factor kappa-B kinase subunit beta [EC:2.7.11.10;]	map04624	Toll and Imd signaling pathway	http://www.kegg.jp/kegg-bin/show_pathway?map04624+K07209
B3KRB7	K07209	IKBKB, IKKB	inhibitor of nuclear factor kappa-B kinase subunit beta [EC:2.7.11.10;]	map04658	Th1 and Th2 cell differentiation	http://www.kegg.jp/kegg-bin/show_pathway?map04658+K07209
B3KRB7	K07209	IKBKB, IKKB	inhibitor of nuclear factor kappa-B kinase subunit beta [EC:2.7.11.10;]	map04659	Th17 cell differentiation	http://www.kegg.jp/kegg-bin/show_pathway?map04659+K07209
B3KRB7	K07209	IKBKB, IKKB	inhibitor of nuclear factor kappa-B kinase subunit beta [EC:2.7.11.10;]	map04660	T cell receptor signaling pathway	http://www.kegg.jp/kegg-bin/show_pathway?map04660+K07209
B3KRB7	K07209	IKBKB, IKKB	inhibitor of nuclear factor kappa-B kinase subunit beta [EC:2.7.11.10;]	map04662	B cell receptor signaling pathway	http://www.kegg.jp/kegg-bin/show_pathway?map04662+K07209
B3KRB7	K07209	IKBKB, IKKB	inhibitor of nuclear factor kappa-B kinase subunit beta [EC:2.7.11.10;]	map04668	TNF signaling pathway	http://www.kegg.jp/kegg-bin/show_pathway?map04668+K07209
B3KRB7	K07209	IKBKB, IKKB	inhibitor of nuclear factor kappa-B kinase subunit beta [EC:2.7.11.10;]	map04722	Neurotrophin signaling pathway	http://www.kegg.jp/kegg-bin/show_pathway?map04722+K07209
B3KRB7	K07209	IKBKB, IKKB	inhibitor of nuclear factor kappa-B kinase subunit beta [EC:2.7.11.10;]	map04910	Insulin signaling pathway	http://www.kegg.jp/kegg-bin/show_pathway?map04910+K07209
B3KRB7	K07209	IKBKB, IKKB	inhibitor of nuclear factor kappa-B kinase subunit beta [EC:2.7.11.10;]	map04920	Adipocytokine signaling pathway	http://www.kegg.jp/kegg-bin/show_pathway?map04920+K07209
B3KRB7	K07209	IKBKB, IKKB	inhibitor of nuclear factor kappa-B kinase subunit beta [EC:2.7.11.10;]	map04930	Type II diabetes mellitus	http://www.kegg.jp/kegg-bin/show_pathway?map04930+K07209
B3KRB7	K07209	IKBKB, IKKB	inhibitor of nuclear factor kappa-B kinase subunit beta [EC:2.7.11.10;]	map04931	Insulin resistance	http://www.kegg.jp/kegg-bin/show_pathway?map04931+K07209
B3KRB7	K07209	IKBKB, IKKB	inhibitor of nuclear factor kappa-B kinase subunit beta [EC:2.7.11.10;]	map04932	Non-alcoholic fatty liver disease (NAFLD)	http://www.kegg.jp/kegg-bin/show_pathway?map04932+K07209
B3KRB7	K07209	IKBKB, IKKB	inhibitor of nuclear factor kappa-B kinase subunit beta [EC:2.7.11.10;]	map05120	Epithelial cell signaling in Helicobacter pylori infection	http://www.kegg.jp/kegg-bin/show_pathway?map05120+K07209
B3KRB7	K07209	IKBKB, IKKB	inhibitor of nuclear factor kappa-B kinase subunit beta [EC:2.7.11.10;]	map05131	Shigellosis	http://www.kegg.jp/kegg-bin/show_pathway?map05131+K07209
B3KRB7	K07209	IKBKB, IKKB	inhibitor of nuclear factor kappa-B kinase subunit beta [EC:2.7.11.10;]	map05142	Chagas disease (American trypanosomiasis)	http://www.kegg.jp/kegg-bin/show_pathway?map05142+K07209
B3KRB7	K07209	IKBKB, IKKB	inhibitor of nuclear factor kappa-B kinase subunit beta [EC:2.7.11.10;]	map05145	Toxoplasmosis	http://www.kegg.jp/kegg-bin/show_pathway?map05145+K07209
B3KRB7	K07209	IKBKB, IKKB	inhibitor of nuclear factor kappa-B kinase subunit beta [EC:2.7.11.10;]	map05160	Hepatitis C	http://www.kegg.jp/kegg-bin/show_pathway?map05160+K07209
B3KRB7	K07209	IKBKB, IKKB	inhibitor of nuclear factor kappa-B kinase subunit beta [EC:2.7.11.10;]	map05161	Hepatitis B	http://www.kegg.jp/kegg-bin/show_pathway?map05161+K07209
B3KRB7	K07209	IKBKB, IKKB	inhibitor of nuclear factor kappa-B kinase subunit beta [EC:2.7.11.10;]	map05164	Influenza A	http://www.kegg.jp/kegg-bin/show_pathway?map05164+K07209
B3KRB7	K07209	IKBKB, IKKB	inhibitor of nuclear factor kappa-B kinase subunit beta [EC:2.7.11.10;]	map05166	HTLV-I infection	http://www.kegg.jp/kegg-bin/show_pathway?map05166+K07209
B3KRB7	K07209	IKBKB, IKKB	inhibitor of nuclear factor kappa-B kinase subunit beta [EC:2.7.11.10;]	map05168	Herpes simplex infection	http://www.kegg.jp/kegg-bin/show_pathway?map05168+K07209
B3KRB7	K07209	IKBKB, IKKB	inhibitor of nuclear factor kappa-B kinase subunit beta [EC:2.7.11.10;]	map05169	Epstein-Barr virus infection	http://www.kegg.jp/kegg-bin/show_pathway?map05169+K07209
B3KRB7	K07209	IKBKB, IKKB	inhibitor of nuclear factor kappa-B kinase subunit beta [EC:2.7.11.10;]	map05200	Pathways in cancer	http://www.kegg.jp/kegg-bin/show_pathway?map05200+K07209
B3KRB7	K07209	IKBKB, IKKB	inhibitor of nuclear factor kappa-B kinase subunit beta [EC:2.7.11.10;]	map05206	MicroRNAs in cancer	http://www.kegg.jp/kegg-bin/show_pathway?map05206+K07209
B3KRB7	K07209	IKBKB, IKKB	inhibitor of nuclear factor kappa-B kinase subunit beta [EC:2.7.11.10;]	map05212	Pancreatic cancer	http://www.kegg.jp/kegg-bin/show_pathway?map05212+K07209
B3KRB7	K07209	IKBKB, IKKB	inhibitor of nuclear factor kappa-B kinase subunit beta [EC:2.7.11.10;]	map05215	Prostate cancer	http://www.kegg.jp/kegg-bin/show_pathway?map05215+K07209
B3KRB7	K07209	IKBKB, IKKB	inhibitor of nuclear factor kappa-B kinase subunit beta [EC:2.7.11.10;]	map05220	Chronic myeloid leukemia	http://www.kegg.jp/kegg-bin/show_pathway?map05220+K07209
B3KRB7	K07209	IKBKB, IKKB	inhibitor of nuclear factor kappa-B kinase subunit beta [EC:2.7.11.10;]	map05221	Acute myeloid leukemia	http://www.kegg.jp/kegg-bin/show_pathway?map05221+K07209
B3KRB7	K07209	IKBKB, IKKB	inhibitor of nuclear factor kappa-B kinase subunit beta [EC:2.7.11.10;]	map05222	Small cell lung cancer	http://www.kegg.jp/kegg-bin/show_pathway?map05222+K07209
Q9ULR3	K17503	PPM1H, ARHCL1	protein phosphatase 1H [EC:3.1.3.16;]
Q4G148	K13676	GXYLT	UDP-xylose:glucoside alpha-1,3-xylosyltransferase [EC:2.4.2.-]	map00514	Other types of O-glycan biosynthesis	http://www.kegg.jp/kegg-bin/show_pathway?map00514+K13676
A0A140VJE0	K00856	E2.7.1.20, ADK	adenosine kinase [EC:2.7.1.20;]	map00230	Purine metabolism	http://www.kegg.jp/kegg-bin/show_pathway?map00230+K00856
B4DQK1	K08337	ATG7	ubiquitin-like modifier-activating enzyme ATG7	map04140	Autophagy	http://www.kegg.jp/kegg-bin/show_pathway?map04140+K08337
Q5T985	K19015	ITIH2, SHAP	inter-alpha-trypsin inhibitor heavy chain H2
O60701	K00012	UGDH, ugd	UDPglucose 6-dehydrogenase [EC:1.1.1.22;]	map00040	Pentose and glucuronate interconversions	http://www.kegg.jp/kegg-bin/show_pathway?map00040+K00012
O60701	K00012	UGDH, ugd	UDPglucose 6-dehydrogenase [EC:1.1.1.22;]	map00053	Ascorbate and aldarate metabolism	http://www.kegg.jp/kegg-bin/show_pathway?map00053+K00012
O60701	K00012	UGDH, ugd	UDPglucose 6-dehydrogenase [EC:1.1.1.22;]	map00520	Amino sugar and nucleotide sugar metabolism	http://www.kegg.jp/kegg-bin/show_pathway?map00520+K00012
O00458
Q5T440
Q53RD8
Q5T123
Q15125	K01824	EBP	cholestenol Delta-isomerase [EC:5.3.3.5;]	map00100	Steroid biosynthesis	http://www.kegg.jp/kegg-bin/show_pathway?map00100+K01824
I3L1D4	K14946	RBFOX, FOX	RNA binding protein fox-1
B4DMX4	K16144	AFP	alpha-fetoprotein	map04390	Hippo signaling pathway	http://www.kegg.jp/kegg-bin/show_pathway?map04390+K16144
P48506	K11204	GCLC	glutamate--cysteine ligase catalytic subunit [EC:6.3.2.2;]	map00270	Cysteine and methionine metabolism	http://www.kegg.jp/kegg-bin/show_pathway?map00270+K11204
P48506	K11204	GCLC	glutamate--cysteine ligase catalytic subunit [EC:6.3.2.2;]	map00480	Glutathione metabolism	http://www.kegg.jp/kegg-bin/show_pathway?map00480+K11204
P48506	K11204	GCLC	glutamate--cysteine ligase catalytic subunit [EC:6.3.2.2;]	map04212	Longevity regulating pathway - worm	http://www.kegg.jp/kegg-bin/show_pathway?map04212+K11204
P01023	K03910	A2M	alpha-2-macroglobulin	map04610	Complement and coagulation cascades	http://www.kegg.jp/kegg-bin/show_pathway?map04610+K03910
Q86U90
A0A024R172	K13948	PTGR1, LTB4DH	prostaglandin reductase 1 [EC:1.3.1.74;1.3.1.48;]
B4DTK6	K15216	RRN3, TIFIA	RNA polymerase I-specific transcription initiation factor RRN3
I3L2L5
F1JVV5	K09053	ATF1	activating transcription factor 1	map04925	Aldosterone synthesis and secretion	http://www.kegg.jp/kegg-bin/show_pathway?map04925+K09053
F1JVV5	K09053	ATF1	activating transcription factor 1	map05166	HTLV-I infection	http://www.kegg.jp/kegg-bin/show_pathway?map05166+K09053
F1JVV5	K09053	ATF1	activating transcription factor 1	map05202	Transcriptional misregulation in cancer	http://www.kegg.jp/kegg-bin/show_pathway?map05202+K09053
F6KPG5	K16141	ALB	serum albumin	map04918	Thyroid hormone synthesis	http://www.kegg.jp/kegg-bin/show_pathway?map04918+K16141
Q16678	K07410	CYP1B1	cytochrome P450 family 1 subfamily B polypeptide 1 [EC:1.14.14.1;]	map00140	Steroid hormone biosynthesis	http://www.kegg.jp/kegg-bin/show_pathway?map00140+K07410
Q16678	K07410	CYP1B1	cytochrome P450 family 1 subfamily B polypeptide 1 [EC:1.14.14.1;]	map00380	Tryptophan metabolism	http://www.kegg.jp/kegg-bin/show_pathway?map00380+K07410
Q16678	K07410	CYP1B1	cytochrome P450 family 1 subfamily B polypeptide 1 [EC:1.14.14.1;]	map00980	Metabolism of xenobiotics by cytochrome P450	http://www.kegg.jp/kegg-bin/show_pathway?map00980+K07410
Q16678	K07410	CYP1B1	cytochrome P450 family 1 subfamily B polypeptide 1 [EC:1.14.14.1;]	map04913	Ovarian steroidogenesis	http://www.kegg.jp/kegg-bin/show_pathway?map04913+K07410
Q16678	K07410	CYP1B1	cytochrome P450 family 1 subfamily B polypeptide 1 [EC:1.14.14.1;]	map05204	Chemical carcinogenesis	http://www.kegg.jp/kegg-bin/show_pathway?map05204+K07410
Q16678	K07410	CYP1B1	cytochrome P450 family 1 subfamily B polypeptide 1 [EC:1.14.14.1;]	map05206	MicroRNAs in cancer	http://www.kegg.jp/kegg-bin/show_pathway?map05206+K07410
B3KM35	K07969	B4GALT4	beta-1,4-galactosyltransferase 4 [EC:2.4.1.90;2.4.1.275;]	map00533	Glycosaminoglycan biosynthesis - keratan sulfate	http://www.kegg.jp/kegg-bin/show_pathway?map00533+K07969
B3KM35	K07969	B4GALT4	beta-1,4-galactosyltransferase 4 [EC:2.4.1.90;2.4.1.275;]	map00601	Glycosphingolipid biosynthesis - lacto and neolacto series	http://www.kegg.jp/kegg-bin/show_pathway?map00601+K07969
G3V1D1	K00522	FTH1	ferritin heavy chain [EC:1.16.3.2;]	map04978	Mineral absorption	http://www.kegg.jp/kegg-bin/show_pathway?map04978+K00522
B4E1V0	K17283	LTF	lactotransferrin [EC:3.4.21.-]
B7Z8R6
B7Z2S5	K00384	trxB	thioredoxin reductase (NADPH) [EC:1.8.1.9;]	map00240	Pyrimidine metabolism	http://www.kegg.jp/kegg-bin/show_pathway?map00240+K00384
B7Z2S5	K00384	trxB	thioredoxin reductase (NADPH) [EC:1.8.1.9;]	map00450	Selenocompound metabolism	http://www.kegg.jp/kegg-bin/show_pathway?map00450+K00384
P07477	K01312	PRSS1_2_3	trypsin [EC:3.4.21.4;]	map04080	Neuroactive ligand-receptor interaction	http://www.kegg.jp/kegg-bin/show_pathway?map04080+K01312
P07477	K01312	PRSS1_2_3	trypsin [EC:3.4.21.4;]	map04972	Pancreatic secretion	http://www.kegg.jp/kegg-bin/show_pathway?map04972+K01312
P07477	K01312	PRSS1_2_3	trypsin [EC:3.4.21.4;]	map04974	Protein digestion and absorption	http://www.kegg.jp/kegg-bin/show_pathway?map04974+K01312
P07477	K01312	PRSS1_2_3	trypsin [EC:3.4.21.4;]	map05164	Influenza A	http://www.kegg.jp/kegg-bin/show_pathway?map05164+K01312
B0AZV9	K20304	TRAPPC6, TRS33	trafficking protein particle complex subunit 6
Q5HYD9
Q9BW34
O15173	K17278	PGRMC1_2	membrane-associated progesterone receptor component
H7C5E8
P09669	K02268	COX6C	cytochrome c oxidase subunit 6c	map00190	Oxidative phosphorylation	http://www.kegg.jp/kegg-bin/show_pathway?map00190+K02268
P09669	K02268	COX6C	cytochrome c oxidase subunit 6c	map04260	Cardiac muscle contraction	http://www.kegg.jp/kegg-bin/show_pathway?map04260+K02268
P09669	K02268	COX6C	cytochrome c oxidase subunit 6c	map04932	Non-alcoholic fatty liver disease (NAFLD)	http://www.kegg.jp/kegg-bin/show_pathway?map04932+K02268
P09669	K02268	COX6C	cytochrome c oxidase subunit 6c	map05010	Alzheimer's disease	http://www.kegg.jp/kegg-bin/show_pathway?map05010+K02268
P09669	K02268	COX6C	cytochrome c oxidase subunit 6c	map05012	Parkinson's disease	http://www.kegg.jp/kegg-bin/show_pathway?map05012+K02268
P09669	K02268	COX6C	cytochrome c oxidase subunit 6c	map05016	Huntington's disease	http://www.kegg.jp/kegg-bin/show_pathway?map05016+K02268
Q71UM5	K02978	RP-S27e, RPS27	small subunit ribosomal protein S27e	map03010	Ribosome	http://www.kegg.jp/kegg-bin/show_pathway?map03010+K02978
P46013	K17582	MKI67	antigen KI-67
Q9H3K6
Q8N4P8	K06943	NOG1	nucleolar GTP-binding protein	map03008	Ribosome biogenesis in eukaryotes	http://www.kegg.jp/kegg-bin/show_pathway?map03008+K06943
H3BMQ2	K02896	RP-L24e, RPL24	large subunit ribosomal protein L24e	map03010	Ribosome	http://www.kegg.jp/kegg-bin/show_pathway?map03010+K02896
P16402	K11275	H1_5	histone H1/5
Q13823	K14537	NUG2, GNL2	nuclear GTP-binding protein	map03008	Ribosome biogenesis in eukaryotes	http://www.kegg.jp/kegg-bin/show_pathway?map03008+K14537
B4DND9	K14840	NOP53, GLTSCR2	nucleolar protein 53	map05168	Herpes simplex infection	http://www.kegg.jp/kegg-bin/show_pathway?map05168+K14840
Q9H9Y2	K14846	RPF1	ribosome production factor 1
O95478	K14842	NSA2	ribosome biogenesis protein NSA2
Q9NY93	K14810	DDX56, DBP9	ATP-dependent RNA helicase DDX56/DBP9 [EC:3.6.4.13;]
B4DMI9	K16804	DLGAP5, DLG7	disks large-associated protein 5
Q5JXX1
D3YTB1	K02912	RP-L32e, RPL32	large subunit ribosomal protein L32e	map03010	Ribosome	http://www.kegg.jp/kegg-bin/show_pathway?map03010+K02912
P63173	K02923	RP-L38e, RPL38	large subunit ribosomal protein L38e	map03010	Ribosome	http://www.kegg.jp/kegg-bin/show_pathway?map03010+K02923
E9PM82	K18666	ASCC1	activating signal cointegrator complex subunit 1
H3BQH3
P62081	K02993	RP-S7e, RPS7	small subunit ribosomal protein S7e	map03010	Ribosome	http://www.kegg.jp/kegg-bin/show_pathway?map03010+K02993
B3KNS8
B3KMT5
Q9NSI2
P63218	K04542	GNG5	guanine nucleotide-binding protein G(I)/G(S)/G(O) subunit gamma-5	map04014	Ras signaling pathway	http://www.kegg.jp/kegg-bin/show_pathway?map04014+K04542
P63218	K04542	GNG5	guanine nucleotide-binding protein G(I)/G(S)/G(O) subunit gamma-5	map04062	Chemokine signaling pathway	http://www.kegg.jp/kegg-bin/show_pathway?map04062+K04542
P63218	K04542	GNG5	guanine nucleotide-binding protein G(I)/G(S)/G(O) subunit gamma-5	map04151	PI3K-Akt signaling pathway	http://www.kegg.jp/kegg-bin/show_pathway?map04151+K04542
P63218	K04542	GNG5	guanine nucleotide-binding protein G(I)/G(S)/G(O) subunit gamma-5	map04713	Circadian entrainment	http://www.kegg.jp/kegg-bin/show_pathway?map04713+K04542
P63218	K04542	GNG5	guanine nucleotide-binding protein G(I)/G(S)/G(O) subunit gamma-5	map04723	Retrograde endocannabinoid signaling	http://www.kegg.jp/kegg-bin/show_pathway?map04723+K04542
P63218	K04542	GNG5	guanine nucleotide-binding protein G(I)/G(S)/G(O) subunit gamma-5	map04724	Glutamatergic synapse	http://www.kegg.jp/kegg-bin/show_pathway?map04724+K04542
P63218	K04542	GNG5	guanine nucleotide-binding protein G(I)/G(S)/G(O) subunit gamma-5	map04725	Cholinergic synapse	http://www.kegg.jp/kegg-bin/show_pathway?map04725+K04542
P63218	K04542	GNG5	guanine nucleotide-binding protein G(I)/G(S)/G(O) subunit gamma-5	map04726	Serotonergic synapse	http://www.kegg.jp/kegg-bin/show_pathway?map04726+K04542
P63218	K04542	GNG5	guanine nucleotide-binding protein G(I)/G(S)/G(O) subunit gamma-5	map04727	GABAergic synapse	http://www.kegg.jp/kegg-bin/show_pathway?map04727+K04542
P63218	K04542	GNG5	guanine nucleotide-binding protein G(I)/G(S)/G(O) subunit gamma-5	map04728	Dopaminergic synapse	http://www.kegg.jp/kegg-bin/show_pathway?map04728+K04542
P63218	K04542	GNG5	guanine nucleotide-binding protein G(I)/G(S)/G(O) subunit gamma-5	map05032	Morphine addiction	http://www.kegg.jp/kegg-bin/show_pathway?map05032+K04542
P63218	K04542	GNG5	guanine nucleotide-binding protein G(I)/G(S)/G(O) subunit gamma-5	map05034	Alcoholism	http://www.kegg.jp/kegg-bin/show_pathway?map05034+K04542
P63218	K04542	GNG5	guanine nucleotide-binding protein G(I)/G(S)/G(O) subunit gamma-5	map05200	Pathways in cancer	http://www.kegg.jp/kegg-bin/show_pathway?map05200+K04542
Q9Y3U8	K02920	RP-L36e, RPL36	large subunit ribosomal protein L36e	map03010	Ribosome	http://www.kegg.jp/kegg-bin/show_pathway?map03010+K02920
Q8IY37	K14780	DHX37, DHR1	ATP-dependent RNA helicase DHX37/DHR1 [EC:3.6.4.13;]
Q9Y6H1
P11388	K03164	TOP2	DNA topoisomerase II [EC:5.99.1.3;]	map01524	Platinum drug resistance	http://www.kegg.jp/kegg-bin/show_pathway?map01524+K03164
P0CJ79	K09228	KRAB	KRAB domain-containing zinc finger protein
B3KQT6	K17356	TSPAN13_31	tetraspanin-13/31
Q9Y3C1
B2RA70	K05705	YES1	tyrosine-protein kinase Yes [EC:2.7.10.2;]	map04520	Adherens junction	http://www.kegg.jp/kegg-bin/show_pathway?map04520+K05705
B2RA70	K05705	YES1	tyrosine-protein kinase Yes [EC:2.7.10.2;]	map04530	Tight junction	http://www.kegg.jp/kegg-bin/show_pathway?map04530+K05705
Q5T7U1	K15202	GTF3C5, TFC1	general transcription factor 3C polypeptide 5 (transcription factor C subunit 1)
Q12872
A0A024RDF4	K13044	HNRNPABD	heterogeneous nuclear ribonucleoprotein A/B/D
A8YQF4	K06751	MHC1	major histocompatibility complex, class I	map04144	Endocytosis	http://www.kegg.jp/kegg-bin/show_pathway?map04144+K06751
A8YQF4	K06751	MHC1	major histocompatibility complex, class I	map04145	Phagosome	http://www.kegg.jp/kegg-bin/show_pathway?map04145+K06751
A8YQF4	K06751	MHC1	major histocompatibility complex, class I	map04514	Cell adhesion molecules (CAMs)	http://www.kegg.jp/kegg-bin/show_pathway?map04514+K06751
A8YQF4	K06751	MHC1	major histocompatibility complex, class I	map04612	Antigen processing and presentation	http://www.kegg.jp/kegg-bin/show_pathway?map04612+K06751
A8YQF4	K06751	MHC1	major histocompatibility complex, class I	map04650	Natural killer cell mediated cytotoxicity	http://www.kegg.jp/kegg-bin/show_pathway?map04650+K06751
A8YQF4	K06751	MHC1	major histocompatibility complex, class I	map04940	Type I diabetes mellitus	http://www.kegg.jp/kegg-bin/show_pathway?map04940+K06751
A8YQF4	K06751	MHC1	major histocompatibility complex, class I	map05166	HTLV-I infection	http://www.kegg.jp/kegg-bin/show_pathway?map05166+K06751
A8YQF4	K06751	MHC1	major histocompatibility complex, class I	map05168	Herpes simplex infection	http://www.kegg.jp/kegg-bin/show_pathway?map05168+K06751
A8YQF4	K06751	MHC1	major histocompatibility complex, class I	map05169	Epstein-Barr virus infection	http://www.kegg.jp/kegg-bin/show_pathway?map05169+K06751
A8YQF4	K06751	MHC1	major histocompatibility complex, class I	map05203	Viral carcinogenesis	http://www.kegg.jp/kegg-bin/show_pathway?map05203+K06751
A8YQF4	K06751	MHC1	major histocompatibility complex, class I	map05320	Autoimmune thyroid disease	http://www.kegg.jp/kegg-bin/show_pathway?map05320+K06751
A8YQF4	K06751	MHC1	major histocompatibility complex, class I	map05330	Allograft rejection	http://www.kegg.jp/kegg-bin/show_pathway?map05330+K06751
A8YQF4	K06751	MHC1	major histocompatibility complex, class I	map05332	Graft-versus-host disease	http://www.kegg.jp/kegg-bin/show_pathway?map05332+K06751
A8YQF4	K06751	MHC1	major histocompatibility complex, class I	map05416	Viral myocarditis	http://www.kegg.jp/kegg-bin/show_pathway?map05416+K06751
Q6DKI1
Q53EY9	K10302	FBXO22	F-box protein 22
Q15397	K14844	PUF6	pumilio homology domain family member 6
Q9BVP2	K14538	NUG1, GNL3	nuclear GTP-binding protein	map03008	Ribosome biogenesis in eukaryotes	http://www.kegg.jp/kegg-bin/show_pathway?map03008+K14538
P50914	K02875	RP-L14e, RPL14	large subunit ribosomal protein L14e	map03010	Ribosome	http://www.kegg.jp/kegg-bin/show_pathway?map03010+K02875
G5E9A6	K11835	USP4_11_15, UBP12	ubiquitin carboxyl-terminal hydrolase 4/11/15 [EC:3.4.19.12;]
P39023	K02925	RP-L3e, RPL3	large subunit ribosomal protein L3e	map03010	Ribosome	http://www.kegg.jp/kegg-bin/show_pathway?map03010+K02925
P31350	K10808	RRM2	ribonucleoside-diphosphate reductase subunit M2 [EC:1.17.4.1;]	map00230	Purine metabolism	http://www.kegg.jp/kegg-bin/show_pathway?map00230+K10808
P31350	K10808	RRM2	ribonucleoside-diphosphate reductase subunit M2 [EC:1.17.4.1;]	map00240	Pyrimidine metabolism	http://www.kegg.jp/kegg-bin/show_pathway?map00240+K10808
P31350	K10808	RRM2	ribonucleoside-diphosphate reductase subunit M2 [EC:1.17.4.1;]	map00480	Glutathione metabolism	http://www.kegg.jp/kegg-bin/show_pathway?map00480+K10808
P31350	K10808	RRM2	ribonucleoside-diphosphate reductase subunit M2 [EC:1.17.4.1;]	map04115	p53 signaling pathway	http://www.kegg.jp/kegg-bin/show_pathway?map04115+K10808
A0A0S2Z5K6	K14001	SIL1, SLS1	nucleotide exchange factor SIL1	map04141	Protein processing in endoplasmic reticulum	http://www.kegg.jp/kegg-bin/show_pathway?map04141+K14001
B4DE48	K17929	SNX17	sorting nexin-17
B3KXW2
B2R823	K11884	PNO1, DIM2	RNA-binding protein PNO1
M0R0F0	K02989	RP-S5e, RPS5	small subunit ribosomal protein S5e	map03010	Ribosome	http://www.kegg.jp/kegg-bin/show_pathway?map03010+K02989
Q9BVJ6	K14567	UTP14	U3 small nucleolar RNA-associated protein 14	map03008	Ribosome biogenesis in eukaryotes	http://www.kegg.jp/kegg-bin/show_pathway?map03008+K14567
Q6N075
Q6FHK1	K02902	RP-L28, MRPL28, rpmB	large subunit ribosomal protein L28	map03010	Ribosome	http://www.kegg.jp/kegg-bin/show_pathway?map03010+K02902
B2R4U3	K06688	UBE2C, UBC11	ubiquitin-conjugating enzyme E2 C [EC:2.3.2.23;]	map04120	Ubiquitin mediated proteolysis	http://www.kegg.jp/kegg-bin/show_pathway?map04120+K06688
B4DE67	K01052	LIPA	lysosomal acid lipase/cholesteryl ester hydrolase [EC:3.1.1.13;]	map00100	Steroid biosynthesis	http://www.kegg.jp/kegg-bin/show_pathway?map00100+K01052
B4DE67	K01052	LIPA	lysosomal acid lipase/cholesteryl ester hydrolase [EC:3.1.1.13;]	map04142	Lysosome	http://www.kegg.jp/kegg-bin/show_pathway?map04142+K01052
Q8TDD1	K14808	DDX54, DBP10	ATP-dependent RNA helicase DDX54/DBP10 [EC:3.6.4.13;]
O60287	K14861	URB1	nucleolar pre-ribosomal-associated protein 1
C9K025	K02917	RP-L35Ae, RPL35A	large subunit ribosomal protein L35Ae	map03010	Ribosome	http://www.kegg.jp/kegg-bin/show_pathway?map03010+K02917
O00767	K00507	SCD, desC	stearoyl-CoA desaturase (Delta-9 desaturase) [EC:1.14.19.1;]	map01040	Biosynthesis of unsaturated fatty acids	http://www.kegg.jp/kegg-bin/show_pathway?map01040+K00507
O00767	K00507	SCD, desC	stearoyl-CoA desaturase (Delta-9 desaturase) [EC:1.14.19.1;]	map01212	Fatty acid metabolism	http://www.kegg.jp/kegg-bin/show_pathway?map01212+K00507
O00767	K00507	SCD, desC	stearoyl-CoA desaturase (Delta-9 desaturase) [EC:1.14.19.1;]	map03320	PPAR signaling pathway	http://www.kegg.jp/kegg-bin/show_pathway?map03320+K00507
O00767	K00507	SCD, desC	stearoyl-CoA desaturase (Delta-9 desaturase) [EC:1.14.19.1;]	map04152	AMPK signaling pathway	http://www.kegg.jp/kegg-bin/show_pathway?map04152+K00507
O00767	K00507	SCD, desC	stearoyl-CoA desaturase (Delta-9 desaturase) [EC:1.14.19.1;]	map04212	Longevity regulating pathway - worm	http://www.kegg.jp/kegg-bin/show_pathway?map04212+K00507
F6TR53
Q9ULW0	K16812	TPX2	targeting protein for Xklp2
Q13895	K14797	ENP1, BYSL	essential nuclear protein 1
A0A0A0MRW6	K14544	UTP22, NOL6	U3 small nucleolar RNA-associated protein 22	map03008	Ribosome biogenesis in eukaryotes	http://www.kegg.jp/kegg-bin/show_pathway?map03008+K14544
Q92876	K08667	KLK6, PRSS9	kallikrein 6 [EC:3.4.21.-]
P62861	K02983	RP-S30e, RPS30	small subunit ribosomal protein S30e	map03010	Ribosome	http://www.kegg.jp/kegg-bin/show_pathway?map03010+K02983
A0A024R8I8
Q8NEF9
A8K800	K14847	RPF2	ribosome production factor 2
P60604	K04555	UBE2G2, UBC7	ubiquitin-conjugating enzyme E2 G2 [EC:2.3.2.23;]	map04120	Ubiquitin mediated proteolysis	http://www.kegg.jp/kegg-bin/show_pathway?map04120+K04555
P60604	K04555	UBE2G2, UBC7	ubiquitin-conjugating enzyme E2 G2 [EC:2.3.2.23;]	map04141	Protein processing in endoplasmic reticulum	http://www.kegg.jp/kegg-bin/show_pathway?map04141+K04555
P60604	K04555	UBE2G2, UBC7	ubiquitin-conjugating enzyme E2 G2 [EC:2.3.2.23;]	map05012	Parkinson's disease	http://www.kegg.jp/kegg-bin/show_pathway?map05012+K04555
A8K7A2	K11514	CDCA8	Borealin
S4R456	K02958	RP-S15e, RPS15	small subunit ribosomal protein S15e	map03010	Ribosome	http://www.kegg.jp/kegg-bin/show_pathway?map03010+K02958
A8K4B4
O75487	K08110	GPC4	glypican 4	map04310	Wnt signaling pathway	http://www.kegg.jp/kegg-bin/show_pathway?map04310+K08110
B3KS36
A0A087WXM6	K02880	RP-L17e, RPL17	large subunit ribosomal protein L17e	map03010	Ribosome	http://www.kegg.jp/kegg-bin/show_pathway?map03010+K02880
Q8TDN6	K14820	BRX1, BRIX1	ribosome biogenesis protein BRX1
B3KRC6	K05917	CYP51	sterol 14-demethylase [EC:1.14.13.70;]	map00100	Steroid biosynthesis	http://www.kegg.jp/kegg-bin/show_pathway?map00100+K05917
Q96HP0
A0A1B0GVI7	K09093	AHR	aryl hydrocarbon receptor	map04659	Th17 cell differentiation	http://www.kegg.jp/kegg-bin/show_pathway?map04659+K09093

## Sheet: map2query
KEGG pathway analysis ACBP-OXA-treated MKN-45 cells protein functions map2query.
Map_ID	Map_Name	Seqs	Seqs_Num	URL
map05206	MicroRNAs in cancer	Q96RG4 B3KRB7 Q16678	3	http://www.kegg.jp/kegg-bin/show_pathway?map05206+K07187+K07209+K07410
map04080	Neuroactive ligand-receptor interaction	P07477	1	http://www.kegg.jp/kegg-bin/show_pathway?map04080+K01312
map04727	GABAergic synapse	P63218	1	http://www.kegg.jp/kegg-bin/show_pathway?map04727+K04542
map04612	Antigen processing and presentation	A8YQF4	1	http://www.kegg.jp/kegg-bin/show_pathway?map04612+K06751
map01524	Platinum drug resistance	P11388	1	http://www.kegg.jp/kegg-bin/show_pathway?map01524+K03164
map00240	Pyrimidine metabolism	B7Z2S5 P31350	2	http://www.kegg.jp/kegg-bin/show_pathway?map00240+K00384+K10808
map04062	Chemokine signaling pathway	B3KRB7 P63218	2	http://www.kegg.jp/kegg-bin/show_pathway?map04062+K07209+K04542
map04728	Dopaminergic synapse	P63218	1	http://www.kegg.jp/kegg-bin/show_pathway?map04728+K04542
map04150	mTOR signaling pathway	B3KRB7	1	http://www.kegg.jp/kegg-bin/show_pathway?map04150+K07209
map05212	Pancreatic cancer	B3KRB7	1	http://www.kegg.jp/kegg-bin/show_pathway?map05212+K07209
map04213	Longevity regulating pathway - multiple species	Q96RG4	1	http://www.kegg.jp/kegg-bin/show_pathway?map04213+K07187
map04140	Autophagy	B4DQK1	1	http://www.kegg.jp/kegg-bin/show_pathway?map04140+K08337
map03010	Ribosome	Q71UM5 H3BMQ2 D3YTB1 P63173 P62081 Q9Y3U8 P50914 P39023 M0R0F0 Q6FHK1 C9K025 P62861 S4R456 A0A087WXM6	14	http://www.kegg.jp/kegg-bin/show_pathway?map03010+K02978+K02896+K02912+K02923+K02993+K02920+K02875+K02925+K02989+K02902+K02917+K02983+K02958+K02880
map00100	Steroid biosynthesis	Q15125 B4DE67 B3KRC6	3	http://www.kegg.jp/kegg-bin/show_pathway?map00100+K01824+K01052+K05917
map04210	Apoptosis	B3KRB7	1	http://www.kegg.jp/kegg-bin/show_pathway?map04210+K07209
map00190	Oxidative phosphorylation	P09669	1	http://www.kegg.jp/kegg-bin/show_pathway?map00190+K02268
map04659	Th17 cell differentiation	B3KRB7 A0A1B0GVI7	2	http://www.kegg.jp/kegg-bin/show_pathway?map04659+K07209+K09093
map04940	Type I diabetes mellitus	A8YQF4	1	http://www.kegg.jp/kegg-bin/show_pathway?map04940+K06751
map05222	Small cell lung cancer	B3KRB7	1	http://www.kegg.jp/kegg-bin/show_pathway?map05222+K07209
map03320	PPAR signaling pathway	A8MW49 O00767	2	http://www.kegg.jp/kegg-bin/show_pathway?map03320+K08750+K00507
map04064	NF-kappa B signaling pathway	B3KRB7	1	http://www.kegg.jp/kegg-bin/show_pathway?map04064+K07209
map04975	Fat digestion and absorption	A8MW49	1	http://www.kegg.jp/kegg-bin/show_pathway?map04975+K08750
map00450	Selenocompound metabolism	B7Z2S5	1	http://www.kegg.jp/kegg-bin/show_pathway?map00450+K00384
map00040	Pentose and glucuronate interconversions	O60701	1	http://www.kegg.jp/kegg-bin/show_pathway?map00040+K00012
map00480	Glutathione metabolism	P48506 P31350	2	http://www.kegg.jp/kegg-bin/show_pathway?map00480+K11204+K10808
map04622	RIG-I-like receptor signaling pathway	B3KRB7	1	http://www.kegg.jp/kegg-bin/show_pathway?map04622+K07209
map04152	AMPK signaling pathway	Q96RG4 O00767	2	http://www.kegg.jp/kegg-bin/show_pathway?map04152+K07187+K00507
map03008	Ribosome biogenesis in eukaryotes	Q8N4P8 Q13823 Q9BVP2 Q9BVJ6 A0A0A0MRW6	5	http://www.kegg.jp/kegg-bin/show_pathway?map03008+K06943+K14537+K14538+K14567+K14544
map05166	HTLV-I infection	B3KRB7 F1JVV5 A8YQF4	3	http://www.kegg.jp/kegg-bin/show_pathway?map05166+K07209+K09053+K06751
map04713	Circadian entrainment	P63218	1	http://www.kegg.jp/kegg-bin/show_pathway?map04713+K04542
map04668	TNF signaling pathway	B3KRB7	1	http://www.kegg.jp/kegg-bin/show_pathway?map04668+K07209
map05221	Acute myeloid leukemia	B3KRB7	1	http://www.kegg.jp/kegg-bin/show_pathway?map05221+K07209
map00230	Purine metabolism	H0YNP9 A0A140VJE0 P31350	3	http://www.kegg.jp/kegg-bin/show_pathway?map00230+K01139+K00856+K10808
map04145	Phagosome	A8YQF4	1	http://www.kegg.jp/kegg-bin/show_pathway?map04145+K06751
map04068	FoxO signaling pathway	Q96RG4 B3KRB7	2	http://www.kegg.jp/kegg-bin/show_pathway?map04068+K07187+K07209
map04390	Hippo signaling pathway	B4DMX4	1	http://www.kegg.jp/kegg-bin/show_pathway?map04390+K16144
map05010	Alzheimer's disease	P09669	1	http://www.kegg.jp/kegg-bin/show_pathway?map05010+K02268
map04514	Cell adhesion molecules (CAMs)	A8YQF4	1	http://www.kegg.jp/kegg-bin/show_pathway?map04514+K06751
map05164	Influenza A	B3KRB7 P07477	2	http://www.kegg.jp/kegg-bin/show_pathway?map05164+K07209+K01312
map01523	Antifolate resistance	B3KRB7	1	http://www.kegg.jp/kegg-bin/show_pathway?map01523+K07209
map04662	B cell receptor signaling pathway	B3KRB7	1	http://www.kegg.jp/kegg-bin/show_pathway?map04662+K07209
map00533	Glycosaminoglycan biosynthesis - keratan sulfate	B3KM35	1	http://www.kegg.jp/kegg-bin/show_pathway?map00533+K07969
map05169	Epstein-Barr virus infection	B3KRB7 A8YQF4	2	http://www.kegg.jp/kegg-bin/show_pathway?map05169+K07209+K06751
map00520	Amino sugar and nucleotide sugar metabolism	O60701	1	http://www.kegg.jp/kegg-bin/show_pathway?map00520+K00012
map00053	Ascorbate and aldarate metabolism	O60701	1	http://www.kegg.jp/kegg-bin/show_pathway?map00053+K00012
map05161	Hepatitis B	B3KRB7	1	http://www.kegg.jp/kegg-bin/show_pathway?map05161+K07209
map04913	Ovarian steroidogenesis	Q16678	1	http://www.kegg.jp/kegg-bin/show_pathway?map04913+K07410
map04120	Ubiquitin mediated proteolysis	B2R4U3 P60604	2	http://www.kegg.jp/kegg-bin/show_pathway?map04120+K06688+K04555
map04621	NOD-like receptor signaling pathway	B1ALI9 B3KRB7	2	http://www.kegg.jp/kegg-bin/show_pathway?map04621+K20910+K07209
map01040	Biosynthesis of unsaturated fatty acids	O00767	1	http://www.kegg.jp/kegg-bin/show_pathway?map01040+K00507
map04142	Lysosome	B4DE67	1	http://www.kegg.jp/kegg-bin/show_pathway?map04142+K01052
map05204	Chemical carcinogenesis	Q16678	1	http://www.kegg.jp/kegg-bin/show_pathway?map05204+K07410
map05215	Prostate cancer	B3KRB7	1	http://www.kegg.jp/kegg-bin/show_pathway?map05215+K07209
map04520	Adherens junction	B2RA70	1	http://www.kegg.jp/kegg-bin/show_pathway?map04520+K05705
map04725	Cholinergic synapse	P63218	1	http://www.kegg.jp/kegg-bin/show_pathway?map04725+K04542
map04151	PI3K-Akt signaling pathway	B3KRB7 P63218	2	http://www.kegg.jp/kegg-bin/show_pathway?map04151+K07209+K04542
map05203	Viral carcinogenesis	A8YQF4	1	http://www.kegg.jp/kegg-bin/show_pathway?map05203+K06751
map00601	Glycosphingolipid biosynthesis - lacto and neolacto series	B3KM35	1	http://www.kegg.jp/kegg-bin/show_pathway?map00601+K07969
map05168	Herpes simplex infection	B3KRB7 B4DND9 A8YQF4	3	http://www.kegg.jp/kegg-bin/show_pathway?map05168+K07209+K14840+K06751
map04930	Type II diabetes mellitus	Q96RG4 B3KRB7	2	http://www.kegg.jp/kegg-bin/show_pathway?map04930+K07187+K07209
map05131	Shigellosis	B3KRB7	1	http://www.kegg.jp/kegg-bin/show_pathway?map05131+K07209
map04972	Pancreatic secretion	P07477	1	http://www.kegg.jp/kegg-bin/show_pathway?map04972+K01312
map04211	Longevity regulating pathway	Q96RG4	1	http://www.kegg.jp/kegg-bin/show_pathway?map04211+K07187
map03015	mRNA surveillance pathway	Q9BWT3	1	http://www.kegg.jp/kegg-bin/show_pathway?map03015+K14376
map05016	Huntington's disease	P09669	1	http://www.kegg.jp/kegg-bin/show_pathway?map05016+K02268
map04722	Neurotrophin signaling pathway	B3KRB7	1	http://www.kegg.jp/kegg-bin/show_pathway?map04722+K07209
map05220	Chronic myeloid leukemia	B3KRB7	1	http://www.kegg.jp/kegg-bin/show_pathway?map05220+K07209
map04014	Ras signaling pathway	B3KRB7 P63218	2	http://www.kegg.jp/kegg-bin/show_pathway?map04014+K07209+K04542
map04530	Tight junction	B2RA70	1	http://www.kegg.jp/kegg-bin/show_pathway?map04530+K05705
map04624	Toll and Imd signaling pathway	B3KRB7	1	http://www.kegg.jp/kegg-bin/show_pathway?map04624+K07209
map04660	T cell receptor signaling pathway	B3KRB7	1	http://www.kegg.jp/kegg-bin/show_pathway?map04660+K07209
map00140	Steroid hormone biosynthesis	Q16678	1	http://www.kegg.jp/kegg-bin/show_pathway?map00140+K07410
map04724	Glutamatergic synapse	P63218	1	http://www.kegg.jp/kegg-bin/show_pathway?map04724+K04542
map04310	Wnt signaling pathway	O75487	1	http://www.kegg.jp/kegg-bin/show_pathway?map04310+K08110
map04260	Cardiac muscle contraction	P09669	1	http://www.kegg.jp/kegg-bin/show_pathway?map04260+K02268
map05160	Hepatitis C	B3KRB7	1	http://www.kegg.jp/kegg-bin/show_pathway?map05160+K07209
map04920	Adipocytokine signaling pathway	Q96RG4 B3KRB7	2	http://www.kegg.jp/kegg-bin/show_pathway?map04920+K07187+K07209
map00380	Tryptophan metabolism	Q16678	1	http://www.kegg.jp/kegg-bin/show_pathway?map00380+K07410
map05416	Viral myocarditis	A8YQF4	1	http://www.kegg.jp/kegg-bin/show_pathway?map05416+K06751
map05332	Graft-versus-host disease	A8YQF4	1	http://www.kegg.jp/kegg-bin/show_pathway?map05332+K06751
map04141	Protein processing in endoplasmic reticulum	A0A0S2Z5K6 P60604	2	http://www.kegg.jp/kegg-bin/show_pathway?map04141+K14001+K04555
map05142	Chagas disease (American trypanosomiasis)	B3KRB7	1	http://www.kegg.jp/kegg-bin/show_pathway?map05142+K07209
map04650	Natural killer cell mediated cytotoxicity	A8YQF4	1	http://www.kegg.jp/kegg-bin/show_pathway?map04650+K06751
map04623	Cytosolic DNA-sensing pathway	B3KRB7	1	http://www.kegg.jp/kegg-bin/show_pathway?map04623+K07209
map04212	Longevity regulating pathway - worm	P48506 O00767	2	http://www.kegg.jp/kegg-bin/show_pathway?map04212+K11204+K00507
map00980	Metabolism of xenobiotics by cytochrome P450	Q16678	1	http://www.kegg.jp/kegg-bin/show_pathway?map00980+K07410
map05200	Pathways in cancer	B3KRB7 P63218	2	http://www.kegg.jp/kegg-bin/show_pathway?map05200+K07209+K04542
map05330	Allograft rejection	A8YQF4	1	http://www.kegg.jp/kegg-bin/show_pathway?map05330+K06751
map04144	Endocytosis	A8YQF4	1	http://www.kegg.jp/kegg-bin/show_pathway?map04144+K06751
map00514	Other types of O-glycan biosynthesis	Q4G148	1	http://www.kegg.jp/kegg-bin/show_pathway?map00514+K13676
map04918	Thyroid hormone synthesis	F6KPG5	1	http://www.kegg.jp/kegg-bin/show_pathway?map04918+K16141
map04974	Protein digestion and absorption	P07477	1	http://www.kegg.jp/kegg-bin/show_pathway?map04974+K01312
map04115	p53 signaling pathway	P31350	1	http://www.kegg.jp/kegg-bin/show_pathway?map04115+K10808
map01212	Fatty acid metabolism	O00767	1	http://www.kegg.jp/kegg-bin/show_pathway?map01212+K00507
map05145	Toxoplasmosis	B3KRB7	1	http://www.kegg.jp/kegg-bin/show_pathway?map05145+K07209
map04931	Insulin resistance	Q96RG4 B3KRB7	2	http://www.kegg.jp/kegg-bin/show_pathway?map04931+K07187+K07209
map04923	Regulation of lipolysis in adipocytes	Q96RG4	1	http://www.kegg.jp/kegg-bin/show_pathway?map04923+K07187
map05032	Morphine addiction	P63218	1	http://www.kegg.jp/kegg-bin/show_pathway?map05032+K04542
map05012	Parkinson's disease	P09669 P60604	2	http://www.kegg.jp/kegg-bin/show_pathway?map05012+K02268+K04555
map04932	Non-alcoholic fatty liver disease (NAFLD)	Q96RG4 B3KRB7 P09669	3	http://www.kegg.jp/kegg-bin/show_pathway?map04932+K07187+K07209+K02268
map00270	Cysteine and methionine metabolism	P48506	1	http://www.kegg.jp/kegg-bin/show_pathway?map00270+K11204
map04010	MAPK signaling pathway	B3KRB7	1	http://www.kegg.jp/kegg-bin/show_pathway?map04010+K07209
map04610	Complement and coagulation cascades	Q8IZZ8 P01023	2	http://www.kegg.jp/kegg-bin/show_pathway?map04610+K03911+K03910
map05202	Transcriptional misregulation in cancer	F1JVV5	1	http://www.kegg.jp/kegg-bin/show_pathway?map05202+K09053
map04910	Insulin signaling pathway	Q96RG4 B3KRB7	2	http://www.kegg.jp/kegg-bin/show_pathway?map04910+K07187+K07209
map03013	RNA transport	Q6IAM0	1	http://www.kegg.jp/kegg-bin/show_pathway?map03013+K03248
map04925	Aldosterone synthesis and secretion	F1JVV5	1	http://www.kegg.jp/kegg-bin/show_pathway?map04925+K09053
map04723	Retrograde endocannabinoid signaling	P63218	1	http://www.kegg.jp/kegg-bin/show_pathway?map04723+K04542
map05034	Alcoholism	P63218	1	http://www.kegg.jp/kegg-bin/show_pathway?map05034+K04542
map04022	cGMP-PKG signaling pathway	Q96RG4	1	http://www.kegg.jp/kegg-bin/show_pathway?map04022+K07187
map04658	Th1 and Th2 cell differentiation	B3KRB7	1	http://www.kegg.jp/kegg-bin/show_pathway?map04658+K07209
map05320	Autoimmune thyroid disease	A8YQF4	1	http://www.kegg.jp/kegg-bin/show_pathway?map05320+K06751
map04380	Osteoclast differentiation	B3KRB7	1	http://www.kegg.jp/kegg-bin/show_pathway?map04380+K07209
map05120	Epithelial cell signaling in Helicobacter pylori infection	B3KRB7	1	http://www.kegg.jp/kegg-bin/show_pathway?map05120+K07209
map04978	Mineral absorption	G3V1D1	1	http://www.kegg.jp/kegg-bin/show_pathway?map04978+K00522
map04620	Toll-like receptor signaling pathway	B3KRB7	1	http://www.kegg.jp/kegg-bin/show_pathway?map04620+K07209
map04726	Serotonergic synapse	P63218	1	http://www.kegg.jp/kegg-bin/show_pathway?map04726+K04542

## Sheet: TopMapStat
KEGG pathway analysis ACBP-OXA-treated MKN-45 cells protein functions TopMapStat.
Map_ID	Map_Name	Seqs	Seqs_Num	URL
map03010	Ribosome	Q71UM5 H3BMQ2 D3YTB1 P63173 P62081 Q9Y3U8 P50914 P39023 M0R0F0 Q6FHK1 C9K025 P62861 S4R456 A0A087WXM6	14	http://www.kegg.jp/kegg-bin/show_pathway?map03010+K02978+K02896+K02912+K02923+K02993+K02920+K02875+K02925+K02989+K02902+K02917+K02983+K02958+K02880
map03008	Ribosome biogenesis in eukaryotes	Q8N4P8 Q13823 Q9BVP2 Q9BVJ6 A0A0A0MRW6	5	http://www.kegg.jp/kegg-bin/show_pathway?map03008+K06943+K14537+K14538+K14567+K14544
map05206	MicroRNAs in cancer	Q96RG4 B3KRB7 Q16678	3	http://www.kegg.jp/kegg-bin/show_pathway?map05206+K07187+K07209+K07410
map00100	Steroid biosynthesis	Q15125 B4DE67 B3KRC6	3	http://www.kegg.jp/kegg-bin/show_pathway?map00100+K01824+K01052+K05917
map05166	HTLV-I infection	B3KRB7 F1JVV5 A8YQF4	3	http://www.kegg.jp/kegg-bin/show_pathway?map05166+K07209+K09053+K06751
map00230	Purine metabolism	H0YNP9 A0A140VJE0 P31350	3	http://www.kegg.jp/kegg-bin/show_pathway?map00230+K01139+K00856+K10808
map05168	Herpes simplex infection	B3KRB7 B4DND9 A8YQF4	3	http://www.kegg.jp/kegg-bin/show_pathway?map05168+K07209+K14840+K06751
map04932	Non-alcoholic fatty liver disease (NAFLD)	Q96RG4 B3KRB7 P09669	3	http://www.kegg.jp/kegg-bin/show_pathway?map04932+K07187+K07209+K02268
map00240	Pyrimidine metabolism	B7Z2S5 P31350	2	http://www.kegg.jp/kegg-bin/show_pathway?map00240+K00384+K10808
map04062	Chemokine signaling pathway	B3KRB7 P63218	2	http://www.kegg.jp/kegg-bin/show_pathway?map04062+K07209+K04542
map04659	Th17 cell differentiation	B3KRB7 A0A1B0GVI7	2	http://www.kegg.jp/kegg-bin/show_pathway?map04659+K07209+K09093
map03320	PPAR signaling pathway	A8MW49 O00767	2	http://www.kegg.jp/kegg-bin/show_pathway?map03320+K08750+K00507
map00480	Glutathione metabolism	P48506 P31350	2	http://www.kegg.jp/kegg-bin/show_pathway?map00480+K11204+K10808
map04152	AMPK signaling pathway	Q96RG4 O00767	2	http://www.kegg.jp/kegg-bin/show_pathway?map04152+K07187+K00507
map04068	FoxO signaling pathway	Q96RG4 B3KRB7	2	http://www.kegg.jp/kegg-bin/show_pathway?map04068+K07187+K07209
map05164	Influenza A	B3KRB7 P07477	2	http://www.kegg.jp/kegg-bin/show_pathway?map05164+K07209+K01312
map05169	Epstein-Barr virus infection	B3KRB7 A8YQF4	2	http://www.kegg.jp/kegg-bin/show_pathway?map05169+K07209+K06751
map04120	Ubiquitin mediated proteolysis	B2R4U3 P60604	2	http://www.kegg.jp/kegg-bin/show_pathway?map04120+K06688+K04555
map04621	NOD-like receptor signaling pathway	B1ALI9 B3KRB7	2	http://www.kegg.jp/kegg-bin/show_pathway?map04621+K20910+K07209
map04151	PI3K-Akt signaling pathway	B3KRB7 P63218	2	http://www.kegg.jp/kegg-bin/show_pathway?map04151+K07209+K04542
map04930	Type II diabetes mellitus	Q96RG4 B3KRB7	2	http://www.kegg.jp/kegg-bin/show_pathway?map04930+K07187+K07209
map04014	Ras signaling pathway	B3KRB7 P63218	2	http://www.kegg.jp/kegg-bin/show_pathway?map04014+K07209+K04542
map04920	Adipocytokine signaling pathway	Q96RG4 B3KRB7	2	http://www.kegg.jp/kegg-bin/show_pathway?map04920+K07187+K07209
map04141	Protein processing in endoplasmic reticulum	A0A0S2Z5K6 P60604	2	http://www.kegg.jp/kegg-bin/show_pathway?map04141+K14001+K04555
map04212	Longevity regulating pathway - worm	P48506 O00767	2	http://www.kegg.jp/kegg-bin/show_pathway?map04212+K11204+K00507
map05200	Pathways in cancer	B3KRB7 P63218	2	http://www.kegg.jp/kegg-bin/show_pathway?map05200+K07209+K04542
map04931	Insulin resistance	Q96RG4 B3KRB7	2	http://www.kegg.jp/kegg-bin/show_pathway?map04931+K07187+K07209
map05012	Parkinson's disease	P09669 P60604	2	http://www.kegg.jp/kegg-bin/show_pathway?map05012+K02268+K04555
map04610	Complement and coagulation cascades	Q8IZZ8 P01023	2	http://www.kegg.jp/kegg-bin/show_pathway?map04610+K03911+K03910
map04910	Insulin signaling pathway	Q96RG4 B3KRB7	2	http://www.kegg.jp/kegg-bin/show_pathway?map04910+K07187+K07209
map04080	Neuroactive ligand-receptor interaction	P07477	1	http://www.kegg.jp/kegg-bin/show_pathway?map04080+K01312
map04727	GABAergic synapse	P63218	1	http://www.kegg.jp/kegg-bin/show_pathway?map04727+K04542
map04612	Antigen processing and presentation	A8YQF4	1	http://www.kegg.jp/kegg-bin/show_pathway?map04612+K06751
map01524	Platinum drug resistance	P11388	1	http://www.kegg.jp/kegg-bin/show_pathway?map01524+K03164
map04728	Dopaminergic synapse	P63218	1	http://www.kegg.jp/kegg-bin/show_pathway?map04728+K04542
map04150	mTOR signaling pathway	B3KRB7	1	http://www.kegg.jp/kegg-bin/show_pathway?map04150+K07209
map05212	Pancreatic cancer	B3KRB7	1	http://www.kegg.jp/kegg-bin/show_pathway?map05212+K07209
map04213	Longevity regulating pathway - multiple species	Q96RG4	1	http://www.kegg.jp/kegg-bin/show_pathway?map04213+K07187
map04140	Autophagy	B4DQK1	1	http://www.kegg.jp/kegg-bin/show_pathway?map04140+K08337
map04210	Apoptosis	B3KRB7	1	http://www.kegg.jp/kegg-bin/show_pathway?map04210+K07209
map00190	Oxidative phosphorylation	P09669	1	http://www.kegg.jp/kegg-bin/show_pathway?map00190+K02268
map04940	Type I diabetes mellitus	A8YQF4	1	http://www.kegg.jp/kegg-bin/show_pathway?map04940+K06751
map05222	Small cell lung cancer	B3KRB7	1	http://www.kegg.jp/kegg-bin/show_pathway?map05222+K07209
map04064	NF-kappa B signaling pathway	B3KRB7	1	http://www.kegg.jp/kegg-bin/show_pathway?map04064+K07209
map04975	Fat digestion and absorption	A8MW49	1	http://www.kegg.jp/kegg-bin/show_pathway?map04975+K08750
map00450	Selenocompound metabolism	B7Z2S5	1	http://www.kegg.jp/kegg-bin/show_pathway?map00450+K00384
map00040	Pentose and glucuronate interconversions	O60701	1	http://www.kegg.jp/kegg-bin/show_pathway?map00040+K00012
map04622	RIG-I-like receptor signaling pathway	B3KRB7	1	http://www.kegg.jp/kegg-bin/show_pathway?map04622+K07209
map04713	Circadian entrainment	P63218	1	http://www.kegg.jp/kegg-bin/show_pathway?map04713+K04542
map04668	TNF signaling pathway	B3KRB7	1	http://www.kegg.jp/kegg-bin/show_pathway?map04668+K07209
map05221	Acute myeloid leukemia	B3KRB7	1	http://www.kegg.jp/kegg-bin/show_pathway?map05221+K07209
map04145	Phagosome	A8YQF4	1	http://www.kegg.jp/kegg-bin/show_pathway?map04145+K06751
map04390	Hippo signaling pathway	B4DMX4	1	http://www.kegg.jp/kegg-bin/show_pathway?map04390+K16144
map05010	Alzheimer's disease	P09669	1	http://www.kegg.jp/kegg-bin/show_pathway?map05010+K02268
map04514	Cell adhesion molecules (CAMs)	A8YQF4	1	http://www.kegg.jp/kegg-bin/show_pathway?map04514+K06751
map01523	Antifolate resistance	B3KRB7	1	http://www.kegg.jp/kegg-bin/show_pathway?map01523+K07209
map04662	B cell receptor signaling pathway	B3KRB7	1	http://www.kegg.jp/kegg-bin/show_pathway?map04662+K07209
map00533	Glycosaminoglycan biosynthesis - keratan sulfate	B3KM35	1	http://www.kegg.jp/kegg-bin/show_pathway?map00533+K07969
map00520	Amino sugar and nucleotide sugar metabolism	O60701	1	http://www.kegg.jp/kegg-bin/show_pathway?map00520+K00012
map00053	Ascorbate and aldarate metabolism	O60701	1	http://www.kegg.jp/kegg-bin/show_pathway?map00053+K00012
map05161	Hepatitis B	B3KRB7	1	http://www.kegg.jp/kegg-bin/show_pathway?map05161+K07209
map04913	Ovarian steroidogenesis	Q16678	1	http://www.kegg.jp/kegg-bin/show_pathway?map04913+K07410
map01040	Biosynthesis of unsaturated fatty acids	O00767	1	http://www.kegg.jp/kegg-bin/show_pathway?map01040+K00507
map04142	Lysosome	B4DE67	1	http://www.kegg.jp/kegg-bin/show_pathway?map04142+K01052
map05204	Chemical carcinogenesis	Q16678	1	http://www.kegg.jp/kegg-bin/show_pathway?map05204+K07410
map05215	Prostate cancer	B3KRB7	1	http://www.kegg.jp/kegg-bin/show_pathway?map05215+K07209
map04520	Adherens junction	B2RA70	1	http://www.kegg.jp/kegg-bin/show_pathway?map04520+K05705
map04725	Cholinergic synapse	P63218	1	http://www.kegg.jp/kegg-bin/show_pathway?map04725+K04542
map05203	Viral carcinogenesis	A8YQF4	1	http://www.kegg.jp/kegg-bin/show_pathway?map05203+K06751
map00601	Glycosphingolipid biosynthesis - lacto and neolacto series	B3KM35	1	http://www.kegg.jp/kegg-bin/show_pathway?map00601+K07969
map05131	Shigellosis	B3KRB7	1	http://www.kegg.jp/kegg-bin/show_pathway?map05131+K07209
map04972	Pancreatic secretion	P07477	1	http://www.kegg.jp/kegg-bin/show_pathway?map04972+K01312
map04211	Longevity regulating pathway	Q96RG4	1	http://www.kegg.jp/kegg-bin/show_pathway?map04211+K07187
map03015	mRNA surveillance pathway	Q9BWT3	1	http://www.kegg.jp/kegg-bin/show_pathway?map03015+K14376
map05016	Huntington's disease	P09669	1	http://www.kegg.jp/kegg-bin/show_pathway?map05016+K02268
map04722	Neurotrophin signaling pathway	B3KRB7	1	http://www.kegg.jp/kegg-bin/show_pathway?map04722+K07209
map05220	Chronic myeloid leukemia	B3KRB7	1	http://www.kegg.jp/kegg-bin/show_pathway?map05220+K07209
map04530	Tight junction	B2RA70	1	http://www.kegg.jp/kegg-bin/show_pathway?map04530+K05705
map04624	Toll and Imd signaling pathway	B3KRB7	1	http://www.kegg.jp/kegg-bin/show_pathway?map04624+K07209
map04660	T cell receptor signaling pathway	B3KRB7	1	http://www.kegg.jp/kegg-bin/show_pathway?map04660+K07209
map00140	Steroid hormone biosynthesis	Q16678	1	http://www.kegg.jp/kegg-bin/show_pathway?map00140+K07410
map04724	Glutamatergic synapse	P63218	1	http://www.kegg.jp/kegg-bin/show_pathway?map04724+K04542
map04310	Wnt signaling pathway	O75487	1	http://www.kegg.jp/kegg-bin/show_pathway?map04310+K08110
map04260	Cardiac muscle contraction	P09669	1	http://www.kegg.jp/kegg-bin/show_pathway?map04260+K02268
map05160	Hepatitis C	B3KRB7	1	http://www.kegg.jp/kegg-bin/show_pathway?map05160+K07209
map00380	Tryptophan metabolism	Q16678	1	http://www.kegg.jp/kegg-bin/show_pathway?map00380+K07410
map05416	Viral myocarditis	A8YQF4	1	http://www.kegg.jp/kegg-bin/show_pathway?map05416+K06751
map05332	Graft-versus-host disease	A8YQF4	1	http://www.kegg.jp/kegg-bin/show_pathway?map05332+K06751
map05142	Chagas disease (American trypanosomiasis)	B3KRB7	1	http://www.kegg.jp/kegg-bin/show_pathway?map05142+K07209
map04650	Natural killer cell mediated cytotoxicity	A8YQF4	1	http://www.kegg.jp/kegg-bin/show_pathway?map04650+K06751
map04623	Cytosolic DNA-sensing pathway	B3KRB7	1	http://www.kegg.jp/kegg-bin/show_pathway?map04623+K07209
map00980	Metabolism of xenobiotics by cytochrome P450	Q16678	1	http://www.kegg.jp/kegg-bin/show_pathway?map00980+K07410
map05330	Allograft rejection	A8YQF4	1	http://www.kegg.jp/kegg-bin/show_pathway?map05330+K06751
map04144	Endocytosis	A8YQF4	1	http://www.kegg.jp/kegg-bin/show_pathway?map04144+K06751
map00514	Other types of O-glycan biosynthesis	Q4G148	1	http://www.kegg.jp/kegg-bin/show_pathway?map00514+K13676
map04918	Thyroid hormone synthesis	F6KPG5	1	http://www.kegg.jp/kegg-bin/show_pathway?map04918+K16141
map04974	Protein digestion and absorption	P07477	1	http://www.kegg.jp/kegg-bin/show_pathway?map04974+K01312
map04115	p53 signaling pathway	P31350	1	http://www.kegg.jp/kegg-bin/show_pathway?map04115+K10808
map01212	Fatty acid metabolism	O00767	1	http://www.kegg.jp/kegg-bin/show_pathway?map01212+K00507
map05145	Toxoplasmosis	B3KRB7	1	http://www.kegg.jp/kegg-bin/show_pathway?map05145+K07209
map04923	Regulation of lipolysis in adipocytes	Q96RG4	1	http://www.kegg.jp/kegg-bin/show_pathway?map04923+K07187
map05032	Morphine addiction	P63218	1	http://www.kegg.jp/kegg-bin/show_pathway?map05032+K04542
map00270	Cysteine and methionine metabolism	P48506	1	http://www.kegg.jp/kegg-bin/show_pathway?map00270+K11204
map04010	MAPK signaling pathway	B3KRB7	1	http://www.kegg.jp/kegg-bin/show_pathway?map04010+K07209
map05202	Transcriptional misregulation in cancer	F1JVV5	1	http://www.kegg.jp/kegg-bin/show_pathway?map05202+K09053
map03013	RNA transport	Q6IAM0	1	http://www.kegg.jp/kegg-bin/show_pathway?map03013+K03248
map04925	Aldosterone synthesis and secretion	F1JVV5	1	http://www.kegg.jp/kegg-bin/show_pathway?map04925+K09053
map04723	Retrograde endocannabinoid signaling	P63218	1	http://www.kegg.jp/kegg-bin/show_pathway?map04723+K04542
map05034	Alcoholism	P63218	1	http://www.kegg.jp/kegg-bin/show_pathway?map05034+K04542
map04022	cGMP-PKG signaling pathway	Q96RG4	1	http://www.kegg.jp/kegg-bin/show_pathway?map04022+K07187
map04658	Th1 and Th2 cell differentiation	B3KRB7	1	http://www.kegg.jp/kegg-bin/show_pathway?map04658+K07209
map05320	Autoimmune thyroid disease	A8YQF4	1	http://www.kegg.jp/kegg-bin/show_pathway?map05320+K06751
map04380	Osteoclast differentiation	B3KRB7	1	http://www.kegg.jp/kegg-bin/show_pathway?map04380+K07209
map05120	Epithelial cell signaling in Helicobacter pylori infection	B3KRB7	1	http://www.kegg.jp/kegg-bin/show_pathway?map05120+K07209
map04978	Mineral absorption	G3V1D1	1	http://www.kegg.jp/kegg-bin/show_pathway?map04978+K00522
map04620	Toll-like receptor signaling pathway	B3KRB7	1	http://www.kegg.jp/kegg-bin/show_pathway?map04620+K07209
map04726	Serotonergic synapse	P63218	1	http://www.kegg.jp/kegg-bin/show_pathway?map04726+K04542

## Sheet: Enrichment
KEGG pathway analysis ACBP-OXA-treated MKN-45 cells protein functions Enrichment.
Map_ID	Map_Name	Test	TestAll	Ref	RefAll	Test_per	Ref_per	Test_Seq	Ref_Seq	Over_Under	P value	FDR	richFactor
map03010	Ribosome	14	128	122	6210	10.9375	1.96457	Q71UM5 H3BMQ2 D3YTB1 P63173 P62081 Q9Y3U8 P50914 P39023 M0R0F0 Q6FHK1 C9K025 P62861 S4R456 A0A087WXM6	P05387 P62888 Q6FG99 P05386 P23396 Q9BTQ7 P30050 P39019 I3L3P7 A8K4W0 M0R210 Q02878 P61513 P62979 D3YTB1 S4R456 E4W6B6 P62280 P08708 P25398 C9K025 P46781 P46783 P62987 Q96IR1 P62269 B3KTM6 A8K4Z4 K7EJT5 P62854 Q8WVC2 P36578 P40429 Q02543 P63173 P62906 P62273 P62857 H7C2W9 P62241 P62277 K7EKI4 P62424 P46779 A0A087WXM6 P15880 P39023 Q53G19 P62750 P18124 P49207 A0A087WV22 C9JNW5 Q9Y2R9 Q07020 P62917…	over	1.58663e-07	1.85636e-05	0.114754
map00100	Steroid biosynthesis	3	128	11	6210	2.34375	0.177134	Q15125 B4DE67 B3KRC6	P37268 Q15738 B3KRC6 P48449 Q3LIE7 Q9NRW5 A8K0D2 B4DE67 B4DHX0 Q15800 Q15125	over	0.00125053	0.0731561	0.272727
map03008	Ribosome biogenesis in eukaryotes	5	128	67	6210	3.90625	1.0789	Q8N4P8 Q13823 Q9BVP2 Q9BVJ6 A0A0A0MRW6	Q96BS4 A0A087X020 Q9NPE3 Q9Y2X3 A8K9K6 P62826 P55769 P78346 P67870 P19784 Q9NX24 E7EU96 K7ESH8 Q9H0A0 Q9NV31 P56537 O14980 A8K6D2 B3KMC9 Q13428 Q12788 O60832 Q9BVP2 E7ETY2 Q8N4P8 Q9BVJ6 F8WC38 Q15061 E9PIN3 A0A0A0MTB8 Q9H089 Q9Y2P8 B3KT11 Q9NY12 Q9NW13 H0YGR4 B2RAX6 A0A087WVD7 B9A008 A8K330 Q9H583 Q969X6 Q8TED0 Q13823 Q9Y3A4 Q05DU1 Q8NB90 Q96F88 A0A0B4J2E5 P78345 Q9BUL9 C9JYM0 Q9UNX4 B3KQ21 A0A0A…	over	0.0119839	0.467371	0.0746269
map04930	Type II diabetes mellitus	2	128	15	6210	1.5625	0.241546	Q96RG4 B3KRB7	P14618 A0A024R5Z9 B4DHN0 E9PB90 B3KT70 B4DG62 B5BUB8 P42345 Q05655 B3KRB7 Q96RG4 B3KUN5 P42338 P27986 B4DLX6	over	0.0371471	0.731024	0.133333
map04610	Complement and coagulation cascades	2	128	17	6210	1.5625	0.273752	Q8IZZ8 P01023	E9PNW4 Q8IZZ8 H3BLV0 Q9NQP5 Q8NCW7 Q8IWL5 B4DDT3 P15529 B7Z553 B7Z1F8 Q59GZ8 A0A0F7G8J1 A0A0J9YY65 A0A0U1RQQ4 P01023 P12259 P01024	over	0.0468494	0.731024	0.117647
map00533	Glycosaminoglycan biosynthesis - keratan sulfate	1	128	3	6210	0.78125	0.0483092	B3KM35	B3KM35 B4DLB8 G3XAD2	over	0.0605795	0.731024	0.333333
map03320	PPAR signaling pathway	2	128	25	6210	1.5625	0.402576	A8MW49 O00767	P07108 Q01469 P09110 P50416 Q16822 Q6IB91 B2R761 Q08426 A0A024R8L7 B3KN05 Q9ULC5 O60488 B4E0R0 A0A1B0GTB8 B4DWX6 A8MW49 P02656 O14975 Q13418 Q06310 B3KNH1 F8W696 O00767 B4DH45 B7Z3U1	over	0.0929827	0.731024	0.08
map05332	Graft-versus-host disease	1	128	5	6210	0.78125	0.0805153	A8YQF4	A0A0S4XQV4 A8YQF4 N1NSB5 P10747 K9J972	over	0.0989283	0.731024	0.2
map05330	Allograft rejection	1	128	5	6210	0.78125	0.0805153	A8YQF4	A0A0S4XQV4 A8YQF4 N1NSB5 P10747 K9J972	over	0.0989283	0.731024	0.2
map05320	Autoimmune thyroid disease	1	128	5	6210	0.78125	0.0805153	A8YQF4	A0A0S4XQV4 A8YQF4 N1NSB5 P10747 K9J972	over	0.0989283	0.731024	0.2
map04659	Th17 cell differentiation	2	128	26	6210	1.5625	0.41868	B3KRB7 A0A1B0GVI7	P08238 P07900 B4DHN0 B5BTZ6 I3L1A4 Q2TAM5 N1NSB5 B5BTY5 P42224 B4E0K5 D3DWY0 C9JWM1 A0A0S2Z3Y4 A0A1B0GVI7 Q06310 Q59F45 P19838 B5BUB8 P42345 Q9BQD2 Q5F2F8 B3KRB7 Q59GT1 P19174 Q4LDX3 K7EK35	over	0.0994201	0.731024	0.0769231
map04920	Adipocytokine signaling pathway	2	128	28	6210	1.5625	0.450886	Q96RG4 B3KRB7	P50416 Q16822 B5BTZ6 Q6IB91 F8VYY9 B3KN05 Q9ULC5 I3L1A4 Q13131 O60488 Q2TAM5 B4E0R0 B3KVN0 B4DVP2 Q06124 D3DWY0 P31749 P31751 Q06310 P19838 B5BUB8 P42345 B3KRB7 B1AMX8 Q96RG4 Q59GT1 Q8IVS6 F5GZ00	over	0.112651	0.731024	0.0714286
map00601	Glycosphingolipid biosynthesis - lacto and neolacto series	1	128	6	6210	0.78125	0.0966184	B3KM35	Q9Y2C3 B3KQT5 B3KM35 B4DLB8 B0FY46 P22083	over	0.117516	0.731024	0.166667
map04940	Type I diabetes mellitus	1	128	7	6210	0.78125	0.112721	A8YQF4	P10809 A0A0S4XQV4 A8YQF4 N1NSB5 P10747 E7ENI6 K9J972	over	0.135723	0.731024	0.142857
map05206	MicroRNAs in cancer	3	128	65	6210	2.34375	1.0467	Q96RG4 B3KRB7 Q16678	H3BPC4 P36952 B2R6J2 B4DUQ1 B5BU83 Q2MJK0 B3KR50 H0YD13 P61586 P35241 Q9NZI8 Q16678 A0A024RAV5 F5H2U8 Q9UH60 P08581 B5BTZ6 G3V5A9 P46109 B4DFY5 P46108 Q00534 Q96FF9 H6TXS1 P36507 P29966 H7BYN4 P01111 P26358 A8K132 H6WA46 I3L4X2 P42574 E7BSV0 B2RAF9 P19838 A0A0U1RQV4 P42345 P04626 B3KRK7 B4DKX4 O43521 Q5T8Z6 Q96EB6 Q9P119 P07996 Q07820 A8K724 B2R728 B4DL02 Q59GZ8 B3KRB7 Q96RG4 Q658X7 P05771 Q8N122…	over	0.149659	0.731024	0.0461538
map00053	Ascorbate and aldarate metabolism	1	128	8	6210	0.78125	0.128824	O60701	P05091 O60701 A0A1B0GTG2 P51648 P30837 P19224 P49189 Q15493	over	0.153558	0.731024	0.125
map00514	Other types of O-glycan biosynthesis	1	128	8	6210	0.78125	0.128824	Q4G148	Q8NBJ5 Q9H488 F5H225 B4DLB8 O60568 Q4G148 O15294 Q59GJ5	over	0.153558	0.731024	0.125
map00480	Glutathione metabolism	2	128	35	6210	1.5625	0.563607	P48506 P31350	P09211 P21266 B2R5M8 B2R983 P31350 Q2Q9H2 Q2VF42 P48735 P28838 P52209 O75223 P48506 Q2NLC8 P52788 P48637 A0A087WTS0 P00390 A0A087WUQ6 O95881 P10620 P19623 B4DNN4 Q7LG56 P48507 O14880 K7ERP4 P09488 P46439 Q16772 J3KNB5 A7E261 Q99735 A8K987 B5MCK8 A0A087X1J7	over	0.161943	0.731024	0.0571429
map04975	Fat digestion and absorption	1	128	9	6210	0.78125	0.144928	A8MW49	A0A024R6W0 A8MW49 O15120 B7ZKQ9 K7ENH4 F8W696 P06727 A0A0A0MR74 E1A689	over	0.171027	0.731024	0.111111
map04212	Longevity regulating pathway - worm	2	128	37	6210	1.5625	0.595813	P48506 O00767	P63104 P10809 P27348 B7Z4V2 P31946 P04040 P48506 P09874 P60520 P02795 P04732 A0A0C4DFU1 B4DDK6 B2R4N3 Q16740 B5BU16 B5BTY5 Q9UKK3 H6WA46 B4E0K5 P51610 A0A024R6M2 B4DDM0 O14776 Q9UBS0 P31749 P31751 Q5MIZ7 E9PMQ6 B5BUB8 P42345 Q96EB6 G3V167 F5GWI9 O00767 P42338 B4DLX6	over	0.176668	0.731024	0.0540541
map04080	Neuroactive ligand-receptor interaction	1	128	10	6210	0.78125	0.161031	P07477	C9JVH3 A0A1B0GUR5 B1AH87 P22466 P07477 B4DDT3 F5CTF4 F5GZI3 A0A0F7G8J1 A0A087WU84	over	0.188139	0.731024	0.1
map00450	Selenocompound metabolism	1	128	10	6210	0.78125	0.161031	B7Z2S5	B7Z2S5 A8K492 A0A0A0MRN7 P32929 O43252 H7C3V9 P49903 Q59ET7 B4DVV7 B4E093	over	0.188139	0.731024	0.1
map04140	Autophagy	1	128	11	6210	0.78125	0.177134	B4DQK1	P60520 Q13131 H7C2A6 M0R308 E9PPR2 Q53SV2 H7BZW5 Q9NT62 B4DQK1 K7ELY9 A0JP11	over	0.2049	0.731024	0.0909091
map00140	Steroid hormone biosynthesis	1	128	11	6210	0.78125	0.177134	Q16678	B4DK69 Q53GQ0 Q16678 P21964 P19224 A0A0A0MSS8 P37059 Q9NRW5 P17516 E7EMT5 P08842	over	0.2049	0.731024	0.0909091
map05168	Herpes simplex infection	3	128	78	6210	2.34375	1.25604	B3KRB7 B4DND9 A8YQF4	C9JFR7 A0A024QZP7 Q07955 P05198 B4DUQ1 A0A0B4J1Z1 Q9UPN1 P62136 E5RJR5 Q13242 B4DJ75 P05114 P84103 A0A024RB10 A0A0S4XQV4 P67870 P19784 E7EU96 E9PB61 Q93009 J3KP15 Q99836 Q59GY3 D3DWK1 Q6LCB0 Q13243 I3L1A4 B7ZKK7 Q2TAM5 B6CGU5 E9PIN3 B4DH52 A8YQF4 N1NSB5 A8K644 A0A0C4DGX4 P42224 A8K651 Q96SB4 Q12962 Q06124 P51610 Q7Z434 D3DWY0 Q59FG7 P42574 Q15750 Q9BRL6 P24928 A0A024RBQ5 B4DHK6 Q9UHD2 H3BT57 Q53T…	over	0.21688	0.731024	0.0384615
map00040	Pentose and glucuronate interconversions	1	128	12	6210	0.78125	0.193237	O60701	P14550 O60701 Q00796 J3QL34 A0A087WYS1 P15121 P19224 Q96AT9 O60218 A0A024RDM2 B3KM56 B4DTH9	over	0.221317	0.731024	0.0833333
map04913	Ovarian steroidogenesis	1	128	12	6210	0.78125	0.193237	Q16678	Q16678 B0AZR9 P17612 A0A0A0MSS8 P37059 P22694 Q9NRW5 Q9UH51 E7EMT5 B7ZKQ9 A8K2S1 O43306	over	0.221317	0.731024	0.0833333
map01040	Biosynthesis of unsaturated fatty acids	1	128	12	6210	0.78125	0.193237	O00767	Q53GQ0 P09110 P40939 O00154 Q9NZ01 A0A024R8L7 A0A087X0W7 Q6Y1H2 F5H8G5 H3BPZ1 A0A0A0MTI6 O00767	over	0.221317	0.731024	0.0833333
map04923	Regulation of lipolysis in adipocytes	1	128	14	6210	0.78125	0.225443	Q96RG4	B0AZR9 P17612 P08754 P22694 B2ZGL7 P31749 P31751 Q8WTS1 Q96RG4 P42338 P27986 O43306 B4DLX6 Q13237	over	0.25315	0.731024	0.0714286
map05032	Morphine addiction	1	128	14	6210	0.78125	0.225443	P63218	Q9UBI6 P62879 B2R6K4 B0AZR9 P17612 P63218 P08754 P22694 A8K103 P25098 P05771 A0A169TED2 B7Z3W6 O43306	over	0.25315	0.731024	0.0714286
map04978	Mineral absorption	1	128	14	6210	0.78125	0.225443	G3V1D1	G3V1D1 O00244 B2R7U4 P05023 P30519 P05026 P02795 P04732 P54709 O15431 B3KW93 Q13733 Q9Y6M5 B5MC02	over	0.25315	0.731024	0.0714286
map04068	FoxO signaling pathway	2	128	48	6210	1.5625	0.772947	Q96RG4 B3KRB7	E9PKG1 P04040 B3KR50 B4DHN0 A0A024RB10 P60520 A0A0C4DFU1 A0A024RAV5 Q9UH60 Q16822 B5BTZ6 Q93009 Q6IB91 F8VYY9 B2R841 B4DFY5 Q13131 P36507 P01111 B5BTY5 P14635 H6WA46 B4DVP2 B4E0K5 Q8WTS6 E7BSV0 B3KRV2 B4DHK6 Q13043 P31749 D7RF68 P31751 Q59F45 Q5U5K4 B5BUB8 P10398 O43521 Q96EB6 F2Z3C8 B3KRB7 Q96RG4 Q59GT1 P42338 P27986 B4DJ05 P55316 Q09472 B4DLX6	over	0.26023	0.731024	0.0416667
map04931	Insulin resistance	2	128	49	6210	1.5625	0.78905	Q96RG4 B3KRB7	Q59GM9 P11216 Q9UPN1 P62136 B4DJ75 Q06210 P50416 Q16822 B5BTZ6 P51812 Q6IB91 A6PVN5 F8VYY9 Q13131 Q2TAM5 P49841 E9PGT3 A8K6K7 P18031 B3KVN0 O14975 H6WA46 B4DVP2 Q06124 B4DRW6 B4DDM0 P10586 Q9UBS0 P31749 P31751 P19838 B5BUB8 E9PK47 P42345 B3KNH1 H0YDQ8 Q05655 O60502 O15294 Q59G74 B3KRB7 Q96RG4 B3KUN5 P05771 B7Z3U1 P42338 P27986 A0A024R637 B4DLX6	over	0.267922	0.731024	0.0408163
map04974	Protein digestion and absorption	1	128	15	6210	0.78125	0.241546	P07477	P05023 P05026 F5GZS6 Q15758 P54709 B3KW93 A8K6H9 P07477 P42785 Q13733 P27487 Q8TBN2 D3DRA2 D3DPU8 B4DH43	over	0.268579	0.731024	0.0666667
map04932	Non-alcoholic fatty liver disease (NAFLD)	3	128	88	6210	2.34375	1.41707	Q96RG4 B3KRB7 P09669	P14854 C9JFR7 O14949 P14927 P05198 Q9UDW1 O95167 O43678 P22695 O00483 P13073 P31930 A0A087WZX2 P60953 O75489 P10606 P63000 Q567R0 P31040 F8WAS3 H3BPJ9 Q07812 O75380 O75438 D6R9Z7 P17568 Q9UI09 P21912 O95298 O95168 Q9BTT5 P28331 O43920 B4DEZ3 P47985 P14406 R4GN43 O75306 F8VYY9 B1PL87 Q13131 P51970 Q2TAM5 Q9UEH5 B7Z7N1 B6CGU5 P49841 P09669 G3V0I5 O43181 Q9NX14 E9PKH6 O14561 Q53SW4 E5E079 H9T3W9 A0A…	over	0.272151	0.731024	0.0340909
map04152	AMPK signaling pathway	2	128	51	6210	1.5625	0.821256	Q96RG4 O00767	P61026 Q15907 P61019 X6RFL8 P13639 P67775 B4DDF7 Q01813 P61006 Q9Y376 P49327 P50416 Q15717 Q16822 Q6IB91 P08237 A8K005 F8VYY9 Q13131 A0A024R0Y2 P17858 A8K6K7 P30154 B4DY91 Q59EF0 Q96L51 Q86XZ2 B4DVP2 B4DDM0 Q9UBS0 P31749 P31751 P63151 P42345 H0YDQ8 J3QS66 Q96EB6 Q96B36 P20248 Q15172 Q96RG4 A0A087X1B8 O00767 Q8N122 F5GZ00 P42338 P27986 A8KA27 X5D7Q2 O00418 B4DLX6	over	0.283301	0.731024	0.0392157
map01523	Antifolate resistance	1	128	16	6210	0.78125	0.257649	B3KRB7	P31939 A0A024RB99 P00374 P22102 D3DXC9 A8K335 Q2TAM5 A8K9A5 I3L4X2 D3DWY0 P19838 B3KRB7 Q59GY6 Q59GT1 P42898 D3DTY0	over	0.283691	0.731024	0.0625
map05416	Viral myocarditis	1	128	16	6210	0.78125	0.257649	A8YQF4	B4E335 C9JFR7 A0A0S4XQV4 P63000 H0Y3P2 E7EUU4 Q03135 B1PL87 B6CGU5 A8YQF4 N1NSB5 P42574 H3BLV0 A0A024R2W4 A0A0U1RQK7 P10747	over	0.283691	0.731024	0.0625
map05166	HTLV-I infection	3	128	91	6210	2.34375	1.46538	B3KRB7 F1JVV5 A8YQF4	P12004 P21796 Q53G71 Q9Y277 P45880 P05141 P12236 Q2MJK0 P27824 A8K787 P62826 B4DL06 A0A140VJF3 P43487 A0A0S4XQV4 Q9Y490 Q07812 A0A024RAV5 O14980 E9PK85 B7Z7F3 P17612 Q13257 B4DYZ7 Q2TAM5 A0A0S2Z3D2 P49841 P14324 A8YQF4 B4DP28 B3KMP2 N1NSB5 P01111 B3KVN0 Q5T8C6 P22694 B4DH44 B1AH87 D3DWY0 P10301 Q8NHZ8 Q9NRF9 P28340 B4DMP4 B4DTN0 P31749 A0A0S2Z3Y4 P31751 A0A0C4DFT3 Q9NR33 Q12834 F1JVV5 Q59F45 Q9UJ…	over	0.289061	0.731024	0.032967
map00230	Purine metabolism	3	128	93	6210	2.34375	1.49758	H0YNP9 A0A140VJE0 P31350	P14618 Q32Q12 A0A024R5Z9 P31939 P00491 P15531 P00492 P49915 P00568 P31350 F8W1A4 P36871 P11908 P60891 H0Y4R1 X6RM59 C9JLU1 P22102 Q7Z4Y4 B4E1L0 P50583 Q9UKK9 A0A087WVZ9 P22234 Q9Y2S0 Q9BY32 H3BQB1 P62875 Q8TCS8 A0A1B0GTJ7 A0A024R6B4 H0YMB3 B4DNN4 Q7LG56 B7Z377 Q9Y2T3 B4DYZ7 P27144 Q8TCD5 A0A024R725 B4DH29 P62487 B4DP28 Q96HT3 Q06203 Q96G03 Q9NUF9 B4DIZ6 D6RCP9 Q9H9Y6 A0A087WVD7 A8K7A0 K7EN15 Q587…	over	0.300382	0.731024	0.0322581
map04062	Chemokine signaling pathway	2	128	54	6210	1.5625	0.869565	B3KRB7 P63218	Q9UBI6 B3KR50 P62834 P60953 B4DHN0 Q13153 P63000 P61586 P62879 B2R6K4 A0A024RAV5 B5BTZ6 P46109 O75116 P17612 B4DFY5 P46108 I3L1A4 P63218 Q2TAM5 P49841 O00401 P01111 P42224 P08754 P12931 P22694 A8K103 D3DWY0 B2RBL9 Q68D16 Q01970 B4DQ79 P31749 B3KVL0 D7RF68 P31751 P25098 P19838 A0A0U1RQV4 Q05655 B4DL02 F5GZI3 Q59GN8 B3KRB7 B3KUN5 Q59GT1 P05771 P42338 P27986 P52735 B4DJ05 O43306 B4DLX6	over	0.306312	0.731024	0.037037
map04624	Toll and Imd signaling pathway	1	128	18	6210	0.78125	0.289855	B3KRB7	P61088 P46734 Q15819 Q99836 Q13404 Q6LCB0 B6CGU5 B5BTY5 B4E0K5 A0A0A0MQU3 P19838 A8K9X5 B5BUB8 B4E1P2 Q12955 H7C2I6 B3KRB7 P16157	over	0.312993	0.731024	0.0555556
map04727	GABAergic synapse	1	128	19	6210	0.78125	0.305958	P63218	Q9UBI6 P60520 P62879 B7Z5J7 B2R6K4 P17612 P63218 P08754 A8K132 P12931 P22694 A8K6H9 Q8NCD8 Q9NQX3 P15104 P05771 A0A169TED2 B7Z3W6 O43306	over	0.327195	0.731024	0.0526316
map00380	Tryptophan metabolism	1	128	19	6210	0.78125	0.305958	Q16678	P05091 P30084 P04040 P24752 P40939 Q16836 A0A1B0GTG2 Q16678 P51648 P30837 A0A0D9SFS3 Q9BWD1 Q08426 A0A0A0MRN7 P49189 P21397 B7Z242 E7EMT5 Q92947	over	0.327195	0.731024	0.0526316
map04925	Aldosterone synthesis and secretion	1	128	19	6210	0.78125	0.305958	F1JVV5	B2RDW0 B0AZR9 P17612 D6R938 P22694 Q5SWX3 Q9UH51 Q01970 Q14573 F1JVV5 B7ZKQ9 A0A024QZX9 P05771 Q9BZL6 A0A169TED2 Q6AZW6 B7Z3W6 Q14571 O43306	over	0.327195	0.731024	0.0526316
map04658	Th1 and Th2 cell differentiation	1	128	20	6210	0.78125	0.322061	B3KRB7	B4DHN0 I3L1A4 Q2TAM5 N1NSB5 B5BTY5 P42224 B4E0K5 D3DWY0 A0A024R9Q8 A0A0S2Z3Y4 P19838 B5BUB8 Q9BQD2 B2R6U9 Q5F2F8 B3KRB7 Q59GT1 P19174 Q4LDX3 K7EK35	over	0.341105	0.731024	0.05
map04723	Retrograde endocannabinoid signaling	1	128	21	6210	0.78125	0.338164	P63218	Q9UBI6 B4DHN0 P62879 B2R6K4 P17612 P63218 B5BTY5 P08754 P22694 B4E0K5 Q01970 Q14573 B2ZGL7 B5BUB8 O00519 A0A024QZX9 P05771 A0A169TED2 B7Z3W6 Q14571 O43306	over	0.35473	0.731024	0.047619
map04621	NOD-like receptor signaling pathway	2	128	61	6210	1.5625	0.982287	B1ALI9 B3KRB7	P21796 P08238 P43490 P07900 P10599 Q9Y277 Q9Y2Z0 P45880 G8JLD5 B4DHN0 P61586 P60520 M0QXH0 Q8NE86 Q99836 Q6LCB0 B4DL49 I3L1A4 Q2TAM5 B6CGU5 A0A0S2Z3D2 B5BTY5 B2R8K8 P42224 Q6PJD5 B4E0K5 Q7Z434 D3DWY0 Q15750 Q01970 Q14573 Q6AI38 A0A024RBQ5 A6NNK5 Q9UHD2 Q86UT6 E9PIB2 A0A024R3E0 B1ALI9 Q53SV2 B6ETL5 P19838 B5BUB8 M0R205 B4DT46 Q05655 B4DTS8 H0Y4S7 B2R9R2 H0YMG8 Q13546 Q9H6R0 B3KRB7 E7EQA9 B1AMX8 Q9…	over	0.35936	0.731024	0.0327869
map00980	Metabolism of xenobiotics by cytochrome P450	1	128	22	6210	0.78125	0.354267	Q16678	P16152 P09211 P21266 B2R983 P47895 P30838 Q2NLC8 P11766 Q16678 H3BLU7 P10620 O75828 P19224 O14880 P09488 P07099 P46439 Q16772 Q96SQ9 E7EMT5 Q99735 A8K987	over	0.368076	0.731024	0.0454545
map04713	Circadian entrainment	1	128	23	6210	0.78125	0.37037	P63218	Q9UBI6 B2RDW0 B4DHN0 C9JVH3 P62879 B2R6K4 B0AZR9 P17612 P63218 D6R938 P08754 P22694 Q5SWX3 Q01970 Q14573 O75052 P05771 A0A169TED2 B7Z3W6 O43306 O75582 Q13237 A0A0U1RRH1	over	0.381147	0.731024	0.0434783
map04910	Insulin signaling pathway	2	128	65	6210	1.5625	1.0467	Q96RG4 B3KRB7	Q59GM9 P11216 B2RDW0 Q9UPN1 P62136 A0A0S2Z472 B3KR50 P49327 B4DJ75 B4DHN0 P62753 P10644 A0A024RAV5 E9PB90 B3KT70 Q16822 P06730 Q6IB91 A8K005 P46109 F8VYY9 P17612 B4DFY5 P46108 Q13131 P36507 A0A024R0Y2 P49841 A8K6K7 Q6FG43 P18031 P01111 B4DG62 C9JEL3 P22694 B4DVP2 A0A140T9R1 B4DRW6 B4DDM0 P10586 Q9UBS0 W4VSQ9 P31749 D7RF68 P31751 A0A0A0MTP6 B5BUB8 E9PK47 P42345 P10398 B2RCZ4 B4DL02 Q63HP7 B3KRB7 Q…	over	0.389035	0.731024	0.0307692
map05204	Chemical carcinogenesis	1	128	24	6210	0.78125	0.386473	Q16678	P16152 P09211 P21266 B2R983 P47895 P30838 Q2NLC8 P11766 Q16678 P10620 P19224 A0A0A0MRN7 O14880 P0DMM9 P09488 A0A1B0GUR5 P07099 P46439 Q16772 E7EMT5 Q99735 A8K987 A6NGV6 Q6U7I7	over	0.39395	0.731024	0.0416667
map04724	Glutamatergic synapse	1	128	25	6210	0.78125	0.402576	P63218	Q9UBI6 B4DHN0 P62879 B2R6K4 B0AZR9 P17612 P63218 P08754 A8K132 P22694 A8K6H9 Q8NCD8 Q01970 Q14573 P25098 Q5U5K4 P15104 Q5F2F8 P05771 B7Z905 A0A169TED2 A8K2S1 B7Z3W6 Q14571 O43306	over	0.406491	0.731024	0.04
map04623	Cytosolic DNA-sensing pathway	1	128	25	6210	0.78125	0.402576	B3KRB7	C9JLU1 A0A087WVZ9 Q9Y2S0 Q59EC0 A0A024DAK3 P62875 I3L1A4 Q2TAM5 Q96HT3 Q7Z434 D3DWY0 D3DSR2 Q9UHD2 A0A024R3E0 E9PHH9 P19838 M0R205 A6NGX6 U3KPY1 Q13546 B3KRB7 Q05DB8 Q59GT1 B7Z6H4 B4DDR0	over	0.406491	0.731024	0.04
map04726	Serotonergic synapse	1	128	25	6210	0.78125	0.402576	P63218	Q9UBI6 B4DHN0 P62879 B2R6K4 A0A024RAV5 B0AZR9 P17612 B4DFY5 P63218 P01111 P08754 P22694 P42574 H7C0V9 Q01970 Q14573 P21397 B7Z242 D7RF68 P10398 P05771 A0A169TED2 A8K2S1 B7Z3W6 Q14571	over	0.406491	0.731024	0.04
map00240	Pyrimidine metabolism	2	128	69	6210	1.5625	1.11111	B7Z2S5 P31350	H0YNW5 Q32Q12 Q9H773 P00491 P15531 B7Z2S5 P31350 P30085 P23919 B5LY71 X6RM59 C9JLU1 P17812 P50583 A0A087WVZ9 Q9Y2S0 B5BU32 P62875 Q8TCS8 Q9NRF8 A0A024R6B4 B4DNN4 Q53SY7 Q7LG56 B7Z377 B4DYZ7 Q8TCD5 Q02127 B4DH29 A8K9A5 P62487 B4DP28 Q16831 Q96HT3 Q9BZX2 Q9NUF9 D6RCP9 Q9H9Y6 A8K7A0 K7EN15 Q587J0 D6RBJ9 A8K6K2 B7ZKR9 D3DSR2 Q3B726 J3KRW8 Q9NRF9 H0Y473 P28340 P24928 B2RBY4 E9PHH9 Q9NR33 C9JQB1 Q59ET7…	over	0.418098	0.731024	0.0289855
map04014	Ras signaling pathway	2	128	69	6210	1.5625	1.11111	B3KRB7 P63218	P51148 Q9UBI6 P20339 B2RDW0 Q13177 B3KR50 P62834 P61020 P62330 P60953 B4DHN0 Q13153 P63000 P61586 P62879 B2R6K4 P11234 A0A024RAV5 P11233 P08581 E9PK85 P17612 B4DFY5 P63218 Q2TAM5 P36507 A0A0S2Z3D2 P01111 P29317 P22694 Q06124 D3DWY0 P10301 E7BSV0 B4DN44 Q13043 P31749 Q9UHD2 B4DWS8 P31751 P19838 B5BUB8 A8MQ02 H0Y6T3 B4E1P2 B4DDN9 A8K724 B3KPN7 B4DL02 B3KRB7 H0Y465 B4DTL8 Q59GT1 Q59E87 Q9NQU5 P05771…	over	0.418098	0.731024	0.0289855
map04622	RIG-I-like receptor signaling pathway	1	128	26	6210	0.78125	0.41868	B3KRB7	A0A0D9SFB3 K7EN45 Q14258 P05161 A0A024R529 Q6LCB0 I3L1A4 Q2TAM5 B6CGU5 B5BTY5 B4E0K5 Q7Z434 D3DWY0 Q9UHD2 Q86UT6 P19838 B5BUB8 M0R205 Q13546 B3KRB7 E7EQA9 B1AMX8 Q53TB6 H7BZQ3 Q59GT1 Q13233	over	0.418773	0.731024	0.0384615
map04725	Cholinergic synapse	1	128	26	6210	0.78125	0.41868	P63218	Q9UBI6 B4DHN0 P62879 B2R6K4 A0A024RAV5 P17612 B4DFY5 P63218 D6R938 P01111 P08754 P22694 A0A1B0GUR5 Q5SWX3 Q01970 Q14573 P31749 P31751 P05771 P42338 P27986 A0A169TED2 B7Z3W6 Q14571 O43306 B4DLX6	over	0.418773	0.731024	0.0384615
map04972	Pancreatic secretion	1	128	26	6210	0.78125	0.41868	P07477	P61006 P62834 P05023 P63000 P61586 P05026 P16615 P00918 B0AZR9 P54709 P55011 B3KW93 Q01970 Q14573 P07477 A0A024RBC7 Q13733 O00194 B2RAH2 Q8TAG3 P05771 A0A169TED2 B7Z3W6 Q14571 Q9Y6R1 O43306	over	0.418773	0.731024	0.0384615
map00270	Cysteine and methionine metabolism	1	128	26	6210	0.78125	0.41868	P48506	Q75MT9 P00338 Q9BV57 P31153 P07195 A0A024R6W0 P40925 P23526 Q16762 P48506 P17174 P52788 P48637 Q96GX9 Q2VEU1 Q9BV20 P19623 A8K7A4 O43865 P48507 B3KSI3 P32929 P26358 H0YID3 Q9UHY7 B7Z6W5	over	0.418773	0.731024	0.0384615
map04064	NF-kappa B signaling pathway	1	128	27	6210	0.78125	0.434783	B3KRB7	H3BPC4 Q14258 P67870 P19784 E7EU96 Q99836 A0A087WWW9 Q2TAM5 A0A0S2Z3D2 D3DWY0 Q15750 B4DQ79 A0A0S2Z3Y4 P19838 B2R9R2 Q13546 H7C2I6 Q59GZ8 B3KRB7 B1AMX8 Q59GT1 P05771 F6SS63 A8K5S1 Q00653 P19174 G8JLD3	over	0.430804	0.731024	0.037037
map05221	Acute myeloid leukemia	1	128	27	6210	0.78125	0.434783	B3KRB7	A0A024R1X8 B3KR50 B4DHN0 A0A024RAV5 B5BTZ6 B4DFY5 Q2TAM5 P36507 P01111 D3DWY0 B4DDM0 C9JWM1 Q9UBS0 P31749 D7RF68 P31751 H3BT57 P19838 P42345 P10398 B3KRB7 Q59GT1 P42338 P27986 K7EK35 B4DJ05 B4DLX6	over	0.430804	0.731024	0.037037
map04115	p53 signaling pathway	1	128	27	6210	0.78125	0.434783	P31350	C9JFR7 A0A024QZP7 P36952 P31947 P31350 Q2MJK0 A0A024RB10 Q07812 Q7LG56 B1PL87 Q00534 B6CGU5 Q92466 B4DMQ7 O14681 P14635 H6WA46 F8VNZ0 P42574 J3KN87 P07996 Q658P3 K9J972 Q9BXH1 Q13535 A0A024R4V8 X5D7Q2	over	0.430804	0.731024	0.037037
map05164	Influenza A	2	128	71	6210	1.5625	1.14332	B3KRB7 P07477	B4E335 C9JFR7 P21796 P11142 P05198 P0DMV9 Q14258 P25685 B4DHN0 Q13838 A0A024R0J9 A8K7D9 Q13217 Q59EC0 P46734 O14980 P78406 A0A024DAK3 Q99836 P34931 P54652 B4DFY5 C9JEV9 I3L1A4 B7ZKK7 B5BU16 Q2TAM5 P36507 E9PIN3 P49841 P14324 B3KSM6 B2R6X5 P52294 N1NSB5 B4DHC5 B5BTY5 P42224 B4DH44 B4E0K5 Q7Z434 P52948 Q86U42 P07477 A0A024RBQ5 P31749 B7Z588 Q9UHD2 Q86UT6 P31751 A0A024R3E0 H3BT57 P19838 B5BUB8 M0R20…	over	0.432372	0.731024	0.028169
map04514	Cell adhesion molecules (CAMs)	1	128	28	6210	0.78125	0.450886	A8YQF4	A0A0S4XQV4 P23229 Q92896 B4DLC3 D3DVF0 P05556 A8YQF4 N1NSB5 O15551 B3KW38 Q9UEL4 A5YM53 D3XNU5 P31431 B2R932 B4DK26 K7EP40 P18827 P10586 Q16393 P10747 Q9BUG9 Q6SYC2 Q495A1 K7EKE8 B4DU18 A0A024R610 A0A0U1RRJ0	over	0.442587	0.731024	0.0357143
map04918	Thyroid hormone synthesis	1	128	28	6210	0.78125	0.450886	F6KPG5	P13667 P11021 Q5CAQ5 P27824 P05023 P05026 A0A087WTS0 P00390 A0A087WUQ6 B0AZR9 P17612 P54709 P22694 B3KW93 Q01970 Q14573 J3KNB5 F6KPG5 Q13733 A0A087X1J7 P05771 B4DZG2 A0A169TED2 Q6AZW6 B7Z3W6 Q14571 P05543 O43306	over	0.442587	0.731024	0.0357143
map04120	Ubiquitin mediated proteolysis	2	128	74	6210	1.5625	1.19163	B2R4U3 P60604	E5RHG8 H3BPC4 P68036 P61081 P61088 E5RJR5 B4DIZ2 P22314 Q9UBE0 B2RBP3 Q16531 Q9UMS4 Q9UBT2 B8ZZU8 Q13619 G3XAG7 B2R4U3 Q05086 P60604 Q53S54 H6TXS1 A0AVT1 Q92466 K7EPJ1 K4DI93 B3KMP2 Q96LR5 H3BUD0 A0A0C4DGX4 Q14139 Q5T8C6 B4DL66 Q9C0C9 A0A024R9U8 B4DUF8 Q8NHZ8 Q5T2B5 A0A0A0MQU3 Q7Z7E8 B4DHK6 Q15386 Q14669 H3BT57 O95155 Q12834 Q9UJX2 Q96J02 A0A0D9SG71 A0A024QZN8 Q6PIA0 B2R9R2 B4DL80 Q96PU5 Q9UJX6 Q…	over	0.45343	0.731024	0.027027
map04612	Antigen processing and presentation	1	128	29	6210	0.78125	0.466989	A8YQF4	P34932 P11142 P08238 Q53G71 Q06323 B3KQT9 P07900 P0DMV9 Q2TNB3 P27824 A0A0S4XQV4 P61289 H0YLF3 P34931 P54652 B4DL49 A8YQF4 B3KSM6 B2R6X5 P25774 N1NSB5 B7Z4S8 Q9HBQ7 A0A024RCT1 Q6QWC0 Q9UG77 F8VSL3 Q9UP03 Q13952	over	0.454129	0.731024	0.0344828
map05142	Chagas disease (American trypanosomiasis)	1	128	30	6210	0.78125	0.483092	B3KRB7	Q53G71 P67775 B4DDF7 B4DHN0 Q99836 B0AZR9 Q6LCB0 Q2TAM5 B6CGU5 P30154 B5BTY5 P08754 B4DH44 B4E0K5 D3DWY0 Q01970 P31749 P31751 P63151 Q59F45 P19838 B5BUB8 H7C2I6 B3KRB7 K9J972 Q59GT1 P42338 P27986 B4DLX6 P01024	over	0.465433	0.731024	0.0333333
map04620	Toll-like receptor signaling pathway	1	128	30	6210	0.78125	0.483092	B3KRB7	B4DHN0 P63000 P46734 Q99836 Q6LCB0 B4DFY5 B5BU16 Q2TAM5 P36507 B6CGU5 B5BTY5 P42224 E9PNS3 B4DH44 B4E0K5 D3DWY0 Q15750 P31749 Q9UHD2 P31751 P19838 B5BUB8 M0R205 Q13546 H7C2I6 B3KRB7 Q59GT1 P42338 P27986 B4DLX6	over	0.465433	0.731024	0.0333333
map05212	Pancreatic cancer	1	128	31	6210	0.78125	0.499195	B3KRB7	Q2MJK0 P60953 B4DHN0 P63000 P11234 A0A024RAV5 P11233 B5BTZ6 B4DFY5 Q00534 Q2TAM5 A0A0S2Z3D2 P42224 D3DWY0 E7BSV0 B4DTN0 P31749 D7RF68 P31751 Q59F45 P19838 B5BUB8 P04626 P10398 B3KRB7 Q59GT1 Q59E87 P42338 P27986 Q4LDX3 B4DLX6	over	0.476505	0.731024	0.0322581
map04662	B cell receptor signaling pathway	1	128	31	6210	0.78125	0.499195	B3KRB7	B3KR50 B4DHN0 P63000 A0A024RAV5 B4DFY5 I3L1A4 A0A087WWW9 Q2TAM5 P36507 H7BYV1 P60033 P49841 P01111 D3DWY0 B4DQ79 P31749 P31751 B4DPS0 P19838 A0A0A0MTP6 Q5F2F8 B4DW38 B3KRB7 Q59GT1 P05771 A8K5S1 P42338 P27986 P52735 B4DJ05 B4DLX6	over	0.476505	0.731024	0.0322581
map04260	Cardiac muscle contraction	1	128	31	6210	0.78125	0.499195	P09669	P14854 P67936 O14949 P14927 Q9UDW1 P22695 P13073 A8K3K1 P31930 P05023 P10606 Q567R0 P06753 P05026 D6R9Z7 P47985 P14406 P09669 P54709 E5E079 H9T3W9 A0A097Q0T5 E5DZN4 P20674 B3KW93 P24311 Q8TBT6 Q13733 B2RAH2 A0A1B0GW58 A0A059RS35	over	0.476505	0.731024	0.0322581
map04380	Osteoclast differentiation	1	128	31	6210	0.78125	0.499195	B3KRB7	B3KR50 B4DHN0 Q14192 P63000 Q13501 B4DFY5 B5BU16 Q2TAM5 B5BTY5 P42224 B4E0K5 D3DWY0 Q15750 P31749 A0A0S2Z3Y4 C9JCN8 P31751 P19838 B5BUB8 B4DT46 P17275 E9PPX2 Q5F2F8 B3KRB7 B1AMX8 Q59GT1 Q00653 P42338 P27986 Q4LDX3 B4DLX6	over	0.476505	0.731024	0.0322581
map04213	Longevity regulating pathway - multiple species	1	128	32	6210	0.78125	0.515298	Q96RG4	P11142 P00441 P0DMV9 P04040 A0A0C4DFU1 A0A024RAV5 B5BU61 F8VYY9 P34931 P54652 P17612 Q13131 B3KSM6 B2R6X5 P01111 B3KUJ5 P22694 B4DVP2 B4DDM0 Q9H078 Q9UBS0 P31749 P31751 P42345 Q96EB6 Q96B36 Q96RG4 Q8N122 P42338 P27986 O43306 B4DLX6	over	0.487349	0.731024	0.03125
map05215	Prostate cancer	1	128	32	6210	0.78125	0.515298	B3KRB7	P08238 P07900 Q5CAQ5 B3KR50 B4DHN0 B4DL06 A0A024RB10 A0A024RAV5 Q9UH60 B4DFY5 Q2TAM5 P36507 P49841 P01111 H6WA46 D3DWY0 E7BSV0 B4DTN0 P31749 D7RF68 P31751 P19838 P42345 P04626 P10398 B3KRB7 Q59GT1 P42338 P27986 B4DJ05 Q09472 B4DLX6	over	0.487349	0.731024	0.03125
map04650	Natural killer cell mediated cytotoxicity	1	128	32	6210	0.78125	0.515298	A8YQF4	B3KR50 B4DHN0 A0A0S4XQV4 Q13153 P63000 A0A024RAV5 B1PL87 B4DFY5 P36507 A8YQF4 P01111 Q06124 P42574 B7Z588 D7RF68 A0A0S2Z3Y4 B4DPS0 P10398 Q5F2F8 B4DL02 Q9UBN6 F8U8C0 K9J972 P05771 P42338 P27986 P19174 P52735 A0A169TED2 B7Z3W6 B4DJ05 B4DLX6	over	0.487349	0.731024	0.03125
map01212	Fatty acid metabolism	1	128	33	6210	0.78125	0.531401	O00767	P30084 Q53GQ0 P55084 A0A0G2JLK3 B2RB23 P24752 P09110 P49748 P40939 P49327 Q16836 P50416 Q9BWD1 P45954 Q08426 P50897 Q9NZ01 A0A024R8L7 B3KN05 Q9ULC5 O60488 A0A024R0Y2 D4QEZ8 B4E0R0 A0A1B0GTB8 B4DWX6 Q8IVS2 Q6Y1H2 F5H8G5 H3BPZ1 B4DV18 A0A0A0MTI6 O00767	over	0.497971	0.736384	0.030303
map04211	Longevity regulating pathway	1	128	35	6210	0.78125	0.563607	Q96RG4	P04040 Q07812 A0A0C4DFU1 A0A024RAV5 P06730 A8K005 F8VYY9 P17612 Q13131 Q2TAM5 P01111 C9JEL3 P22694 B4DVP2 B4DDM0 Q9UBS0 P31749 P31751 B4DQX8 E9PPR2 P19838 P42345 A0A1B0GU48 Q96EB6 Q96B36 Q96RG4 Q8N122 F5GZ00 P42338 P27986 Q6AZW6 Q59FM7 X5D7Q2 O43306 B4DLX6	over	0.518563	0.736384	0.0285714
map00520	Amino sugar and nucleotide sugar metabolism	1	128	36	6210	0.78125	0.57971	O60701	O60547 O60701 P36871 B4DE36 Q06210 Q96EK6 A8K3S1 A0A087WYS1 B2R6D4 Q8TDQ7 E9PB90 B3KT70 Q14376 A0A024R4X0 Q9NR45 Q9BVJ8 P07686 Q13630 A0A140VKC0 Q8ND26 O95394 Q9Y5P6 Q6QNY5 Q9UHQ9 Q96G03 B4DW50 B4DG62 P51570 Q96IJ6 A8K237 Q53GF0 E9PPU6 Q92871 A0A0S2Z4Z3 B2R7W7 B7ZKJ7	over	0.528543	0.736384	0.0277778
map05220	Chronic myeloid leukemia	1	128	36	6210	0.78125	0.57971	B3KRB7	Q2MJK0 B3KR50 B4DHN0 A0A024RAV5 Q9UH60 B5BU61 Q13363 P46109 B4DFY5 P46108 Q00534 Q2TAM5 P36507 A0A0S2Z3D2 P01111 P56545 B3KUJ5 Q06124 D3DWY0 B4DTN0 C9JWM1 P31749 D7RF68 P31751 P19838 P10398 B4DL02 B3KRB7 P11274 Q9ULV8 Q59GT1 P42338 P27986 K7EK35 B4DJ05 B4DLX6	over	0.528543	0.736384	0.0277778
map04668	TNF signaling pathway	1	128	37	6210	0.78125	0.595813	B3KRB7	G8JLD5 B4DHN0 P46734 Q8NB16 Q6LCB0 Q96HS1 B4DFY5 B5BU16 Q2TAM5 B6CGU5 Q99557 B5BTY5 B4DH44 B4E0K5 D3DWY0 P42574 Q15750 P31749 P31751 Q96J02 P19838 B5BUB8 P17275 B2RA34 Q13546 B3KRB7 B1AMX8 K9J972 Q59GT1 Q8IVS6 F6SS63 P42338 P27986 Q6AZW6 B2R6P3 O75582 B4DLX6	over	0.538317	0.736384	0.027027
map05222	Small cell lung cancer	1	128	38	6210	0.78125	0.611916	B3KRB7	C9JFR7 A0A024RB10 P23229 Q00534 Q2TAM5 P05556 A0A0S2Z3D2 H6WA46 P17301 A5YM53 F8VNZ0 D3DWY0 Q8TAX8 A0A0A0MTS5 B4DTN0 B4DHK6 Q5T179 P31749 P31751 Q13751 Q06310 P19838 B4E0H8 Q6PIA0 B2R9R2 Q59GN8 B3KRB7 B1AMX8 Q59GT1 A0A024R972 P02751 P42338 P27986 P07942 B4DLX6 O15230 Q13753 B4DH43	over	0.54789	0.736384	0.0263158
map04660	T cell receptor signaling pathway	1	128	38	6210	0.78125	0.611916	B3KRB7	Q13177 B3KR50 P60953 B4DHN0 Q13153 P61586 A0A024RAV5 B4DFY5 I3L1A4 A0A087WWW9 Q2TAM5 P36507 P49841 P01111 B5BTY5 B4E0K5 D3DWY0 P31749 A0A0S2Z3Y4 P31751 A0A0C4DFT3 B4DPS0 P19838 P10747 A8K724 Q5F2F8 B3KRB7 Q53TG4 Q9ULV8 Q59GT1 Q9NQU5 A8K5S1 P42338 P27986 P19174 P52735 B4DJ05 B4DLX6	over	0.54789	0.736384	0.0263158
map05120	Epithelial cell signaling in Helicobacter pylori infection	1	128	38	6210	0.78125	0.611916	B3KRB7	P38606 P60953 Q16864 Q13153 P63000 P21283 P36543 P21281 O75348 P08581 O14672 D3DVF0 Q2TAM5 G3V2S6 B2R7M1 G3V126 B5BTY5 A0A0C4DGN6 Q07157 P12931 B4DH44 Q06124 B4E0K5 D3DWY0 P42574 E7BSV0 A8K3B6 P27449 B4DQ79 B3KR70 P78536 P19838 B5BUB8 B3KRB7 Q53ET5 Q59GT1 P19174 Q9Y239	over	0.54789	0.736384	0.0263158
map04520	Adherens junction	1	128	39	6210	0.78125	0.628019	B2RA70	B4E335 O43707 P35221 A0A024QZN4 P12814 P46940 Q96FS1 P60953 B4DHN0 B4DL06 P63000 P61586 P67870 P19784 E7EU96 P08581 B7Z8W3 P18031 O00401 P26232 B2RA70 Q07157 P12931 D3XNU5 E7BSV0 Q9Y6W5 P10586 B4DPS0 Q59F45 B4DWA1 P04626 A8MQ02 Q6SYC2 F5GZI3 Q12913 K7EKE8 B4DH45 O94887 Q09472	over	0.557266	0.736384	0.025641
map05131	Shigellosis	1	128	39	6210	0.78125	0.628019	B3KRB7	P07737 C9J0J7 B4E335 O15511 A0A024QZN4 Q14247 H0YD13 P60953 B4DHN0 P63000 O15144 Q9BPX5 P59998 B2R4D5 P46109 O75116 A0A140T8Z0 P84095 P46108 I3L1A4 Q2TAM5 P05556 Q01081 O00401 B5BTY5 O15143 P12931 B4E0K5 D3DWY0 Q9Y6W5 Q53GB6 Q96BJ8 P19838 A0A0U1RQV4 B5BUB8 B3KRB7 Q59GT1 B2RUU3 Q9Y239	over	0.557266	0.736384	0.025641
map01524	Platinum drug resistance	1	128	40	6210	0.78125	0.644122	P11388	C9JFR7 P09211 P21266 B2R983 Q2MJK0 B4DHN0 P11388 Q07812 Q8WWH8 P10620 Q6LCB0 B1PL87 Q02880 P43246 H6TXS1 O14880 P52701 B6CGU5 A0A0S2Z3D2 P09488 O15431 H0Y818 F8VNZ0 P46439 P42574 Q16772 A3E0Z5 P31749 P31751 Q99735 A8K987 P04626 B3KRK7 B2R9R2 K9J972 Q9BXH1 P42338 P27986 A8K1E1 B4DLX6	over	0.56645	0.736384	0.025
map04310	Wnt signaling pathway	1	128	40	6210	0.78125	0.644122	O75487	B5BUB1 Q9HB71 E5RJR5 B7Z475 B4DL06 P63000 P61586 P67870 P19784 E7EU96 P48729 Q13363 O75116 P17612 P49841 D6R938 A0A0C4DGX4 P56545 O75487 I3L425 P22694 Q5SWX3 Q01970 B3KRV2 B4DDW4 B5BUB8 Q9P119 B4E236 P62877 E9PPX2 Q5F2F8 B4E2D6 P05771 A0A169TED2 B7Z3W6 O75084 Q9HCK8 O75197 Q09472 A8K6X5	over	0.56645	0.736384	0.025
map05034	Alcoholism	1	128	42	6210	0.78125	0.676329	P63218	P06899 A8K9J7 Q9UBI6 P62805 O75367 B2RDW0 Q9UPN1 P62136 Q96KK5 B2R5B6 B3KR50 B4DJ75 B4DHN0 Q96A08 B2R6Y1 Q5TEC6 P62879 B2R6K4 Q9UD71 A0A024RAV5 P0C0S5 B5BU61 B0AZR9 P16104 B4DFY5 P63218 Q9P0M6 O14929 P01111 P08754 B3KUJ5 O15379 P21397 B7Z242 D7RF68 P10398 B4DL02 B3KNA1 B7Z8I2 F5GZ00 Q6AZW6 B4DJ05	over	0.584253	0.739405	0.0238095
map04728	Dopaminergic synapse	1	128	43	6210	0.78125	0.692432	P63218	Q9UBI6 P67775 B2RDW0 Q9UPN1 P33176 B4DDF7 P62136 B4DJ75 P62879 B2R6K4 Q9UD71 P21964 B0AZR9 P17612 P63218 P49841 D6R938 P30154 B5BTY5 P08754 Q59EF0 Q96L51 P22694 Q86XZ2 B4E0K5 Q68D16 Q5SWX3 A0A1B0GWE6 Q01970 Q14573 P21397 P31749 B7Z242 P31751 P63151 B5BUB8 Q5F2F8 Q15172 P05771 A0A169TED2 Q6AZW6 B7Z3W6 Q14571	over	0.592881	0.739405	0.0232558
map05012	Parkinson's disease	2	128	97	6210	1.5625	1.562	P09669 P60604	P68036 A0A059S4M9 O75947 P14854 C9JFR7 P21796 O14949 P14927 P18859 Q9UDW1 Q99497 O95167 O43678 A0A096WXL7 Q9Y277 P22695 P45880 O00483 P06576 P13073 P05141 P25705 P12236 P31930 A8K787 A0A087WZX2 P22314 O75489 P48047 P10606 Q567R0 P31040 Q5QNZ2 B4DL14 F8WAS3 H3BPJ9 O75380 O75438 D6R9Z7 P17568 Q9UI09 P21912 O95298 O95168 Q9BTT5 P56381 P28331 O43920 B4DEZ3 P47985 P14406 B2R6X6 R4GN43 O75306 Q14WI3 P1…	over	0.598745	0.739405	0.0206186
map04022	cGMP-PKG signaling pathway	1	128	44	6210	0.78125	0.708535	Q96RG4	P21796 B2RDW0 Q9Y277 A0A0S2Z4N8 A0A0S2Z4I9 Q9UPN1 P45880 P62136 P05141 A0A0S2Z4I7 P12236 B4DJ75 A8K787 P05023 B4DHN0 P61586 P05026 P16615 B2R6X6 O75116 B4DFY5 P36507 B4DH52 P54709 P08754 B3KW93 Q01970 Q14573 P31749 P31751 A0A024RBC7 Q13733 B2RAH5 A0A0U1RQV4 Q5F2F8 Q96RG4 G5E9C5 P42338 P27986 Q6AZW6 Q14571 O43306 B4DLX6 Q13237	over	0.601331	0.739405	0.0227273
map04390	Hippo signaling pathway	1	128	46	6210	0.78125	0.740741	B4DMX4	P62258 P63104 B4E335 P27348 Q04917 P31946 P35221 P67775 P61981 Q9UPN1 B4DDF7 P62136 B4DJ75 B4DL06 P49841 J3QRV5 P30154 P26232 Q7L9L4 D3XNU5 C9JRJ5 Q92796 A0A024R8X3 A0A0G2JNZ2 C8C069 B3KRV2 A3E0Z5 A0A0U1RR46 A0A0C4DFT3 P63151 Q59F45 Q13188 C9JQS8 Q9P119 Q9BYG5 B4E236 B2RCZ4 F5GZI3 B4E2D6 B3KUN5 Q9BXH1 A0A024R1D9 Q658X5 A0A087WW77 O75084 B4DMX4	over	0.617712	0.739405	0.0217391
map04722	Neurotrophin signaling pathway	1	128	47	6210	0.78125	0.756844	B3KRB7	P62258 B2RDW0 B3KR50 P62834 P60953 B4DHN0 P63000 P61586 Q07812 A0A024RAV5 J3KTF8 P51812 P46109 B4DFY5 P46108 I3L1A4 Q2TAM5 P36507 P49841 E9PGT3 D6R938 P01111 B5BTY5 Q06124 B4E0K5 Q5SWX3 P49137 P31749 D7RF68 P31751 P19838 B5BUB8 Q05655 B4DL02 H7C2I6 B3KRB7 A8KAQ3 Q9ULH0 P42338 P27986 P19174 Q8TEN0 A0A024QZC2 B4DJ05 O75582 B4DLX6 Q13233	over	0.625651	0.739405	0.0212766
map05145	Toxoplasmosis	1	128	47	6210	0.78125	0.756844	B3KRB7	C9JFR7 P11142 P0DMV9 B4DHN0 P46734 B5BTZ6 P23229 Q99836 B2R6X6 P34931 P54652 I3L1A4 B5BU16 Q2TAM5 B6CGU5 P05556 A0A0S2Z3D2 B3KSM6 B2R6X5 N1NSB5 B5BTY5 P42224 P08754 B4E0K5 D3DWY0 P42574 A0A0A0MTS5 Q15750 Q9UH51 P31749 P31751 Q13751 P19838 B5BUB8 Q6PIA0 B2R9R2 H7C2I6 B3KRB7 Q59GT1 A0A024R972 P42338 P27986 Q4LDX3 P07942 B4DLX6 O15230 Q13753	over	0.625651	0.739405	0.0212766
map05202	Transcriptional misregulation in cancer	1	128	47	6210	0.78125	0.756844	F1JVV5	J3KTA4 A0A024R1X8 Q9H4A6 B4E312 B2R6Y1 Q5TEC6 F5H2U8 Q9UH60 P08581 Q59H57 B5BU61 Q9H4A5 Q2TAM5 H3BVD9 A0A0S2Z3D2 G9G6R5 B2R9L6 Q99557 Q9NZQ5 B3KUJ5 B0QYK0 Q96ST3 Q8TAX8 Q9BZE9 C9JWM1 A0A0S2Z470 H3BT57 Q06310 F1JVV5 P19838 H0YG25 Q5T8Z6 C4PGM0 Q03111 B4E1P2 Q59GZ8 Q59GN8 G3XAD2 Q658X7 K7ENH8 A0A088AWL3 F4MH37 H0Y6I7 A8K4M5 O96028 P19532 Q03164	over	0.625651	0.739405	0.0212766
map04151	PI3K-Akt signaling pathway	2	128	98	6210	1.5625	1.5781	B3KRB7 P63218	P62258 P63104 P27348 Q04917 Q9UBI6 P08238 P31946 P07900 P67775 P61981 B4DDF7 Q5CAQ5 B3KR50 B4DHN0 A0A024RB10 P63000 P62753 A0A024R8K7 P62879 Q16543 B2R6K4 B4DEP6 A0A024RAV5 Q9UH60 P08581 Q16822 P06730 P23229 Q6IB91 A8K005 Q16513 B4DFY5 Q00534 P63218 Q13131 H6TXS1 Q2TAM5 P36507 P05556 A0A0S2Z3D2 P49841 A8K6K7 P30154 P01111 P29317 Q59EF0 Q96L51 C9JEL3 Q86XZ2 H6WA46 P17301 A5YM53 D3DWY0 B4DDM0 B4E2B…	under	0.60437	0.739405	0.0204082
map05160	Hepatitis C	1	128	50	6210	0.78125	0.805153	B3KRB7	P05198 P67775 B4DDF7 B3KR50 B4DHN0 P61289 P60228 A0A024RAV5 B5BTZ6 B4DLC3 B7ZKK7 Q2TAM5 P60033 P49841 P30154 O15551 P01111 B5BTY5 P42224 B3KW38 B4E0K5 Q7Z434 D3DWY0 E7BSV0 K7EP40 Q9UH51 A0A024RBQ5 P31749 Q9UHD2 D7RF68 P31751 P63151 P19838 B5BUB8 M0R205 B7ZKQ9 P10398 B4DTS8 Q13546 B3KRB7 B1AMX8 Q1XBU8 H0YME5 Q59GT1 P42338 P27986 Q4LDX3 B4DJ05 C9J185 B4DLX6	under	0.648498	0.758742	0.02
map05169	Epstein-Barr virus infection	2	128	112	6210	1.5625	1.80354	B3KRB7 A8YQF4	P62258 P63104 P62195 P27348 A0A024QZP7 Q04917 A0A024R201 P11142 P31946 R4GNH3 B3KNN7 P35998 P0DMV9 P62191 P61981 O00231 Q15008 P62333 C9JLU1 H0YD13 O00232 Q99460 P62826 A0A024RB10 A0A0S4XQV4 Q13200 P67870 Q5U0B3 P19784 B2R5U1 A0A087WVZ9 P43686 Q9Y2S0 B4E299 E7EU96 Q5VWC4 P04792 P46734 O14980 Q9UH60 B5BTZ6 Q93009 P62875 B5BU61 Q00403 A0A024R6E3 P34931 P29084 B7Z377 P54652 P17612 B8ZZQ6 I3L1A4 B7ZK…	under	0.676945	0.776495	0.0178571
map04141	Protein processing in endoplasmic reticulum	2	128	112	6210	1.5625	1.80354	A0A0S2Z5K6 P60604	P07237 A7BI36 P13667 P11142 P08238 Q53G71 Q07065 P55072 P11021 B3KQT9 P07900 P05198 P0DMV9 P51572 P30040 P04843 A0A024RDQ0 F5GXX5 Q9Y4L1 Q5CAQ5 E5RJR5 B3KM36 P27824 P25685 Q15084 Q86UY0 P49257 B2RE46 Q9NR31 P60468 P31689 Q13217 Q96HE7 Q9UBS4 Q9UNZ2 Q53FE8 A0A024R7F1 Q07812 R9WWI7 O60884 Q14697 O95757 A0A024R5A3 B4DWN1 Q9NZL4 Q9NYU2 B4DZF1 P34931 P51571 Q53F37 P54652 Q8TAT6 B3KNI2 B7ZKK7 Q9HCU5 P6…	under	0.676945	0.776495	0.0178571
map05161	Hepatitis B	1	128	60	6210	0.78125	0.966184	B3KRB7	P63104 P12004 C9JFR7 R4GMU8 P27348 P31946 A0A0D9SFB3 Q9Y277 B3KR50 B4DHN0 A0A024RB10 Q16531 Q07812 A0A024RAV5 Q9UH60 B5BTZ6 Q99836 Q6LCB0 B4DFY5 Q00534 Q2TAM5 P36507 B6CGU5 Q92466 P01111 P42224 P12931 B4DH44 H6WA46 F8VNZ0 Q7Z434 D3DWY0 P42574 B4DTN0 A3E0Z5 P31749 B3KR70 Q9UHD2 P31751 A0A024RAB6 P19838 B5BUB8 M0R205 Q9BQD2 P20248 B3KRB7 Q53TB6 K9J972 Q59GT1 P05771 P42338 P27986 Q4LDX3 A0A169TED2 Q…	under	0.715117	0.812317	0.0166667
map03015	mRNA surveillance pathway	1	128	63	6210	0.78125	1.01449	Q9BWT3	P61326 P67775 Q9UPN1 B4DDF7 P62136 Q9BRP8 B4DJ75 B2R6U8 Q13838 B7Z7P8 H3BR35 P38919 A0A024R7L5 O00422 E9PID8 Q6IQ30 Q9Y5S9 E9PB61 B4DHE8 Q9NP77 Q05048 C9JEV9 A8K964 K7EQ02 F5H669 B4DQM6 E9PIN3 F8WJN3 O43148 Q12996 P30154 S4R3H4 Q09161 P52298 Q59EF0 Q96L51 D3DWL9 G5E9W3 A0A024QZR3 Q6UN15 G3XAH6 Q86XZ2 H3BV80 B7Z524 Q92797 Q6UXN9 B3KN45 Q86U42 Q8IYB3 Q9BWT3 P63151 I3L390 Q9HAU5 B3KSJ3 B4DKR6 Q9UKK6…	under	0.73254	0.82037	0.015873
map04145	Phagosome	1	128	66	6210	0.78125	1.0628	A8YQF4	P51149 B4E335 P51148 Q53G71 P07437 P20339 P68366 P02786 Q13885 Q9BVA1 P04350 P27824 P38606 Q53GA7 P61020 Q16864 A0A0S4XQV4 P63000 P21283 O75396 P60468 Q14204 P36543 P21281 Q15836 O75348 O15400 B4DP54 Q3ZCM7 Q9Y6G9 O43237 Q6LEU0 P05556 P20645 Q9NY65 A8YQF4 P25774 G3V2S6 B2R7M1 D6RF48 P60059 N1NSB5 G3V126 B4DPZ3 M0R308 P17301 A5YM53 B4E1E2 P27449 Q15075 B3KRY3 B3KR70 A6NHL2 Q9HBQ7 Q6QWC0 P61619 B4D…	under	0.748905	0.82037	0.0151515
map04150	mTOR signaling pathway	1	128	67	6210	0.78125	1.0789	B3KRB7	R4GMU8 P38606 Q9Y376 B3KR50 Q16864 B4DHN0 P62753 P61586 P21283 P36543 F5GZS6 P21281 B4DEP6 A0A024RAV5 O75348 P51812 P06730 H0YFI1 A8K005 Q9Y2Q5 B4DFY5 Q96EE3 Q13131 P36507 P55735 P49841 E9PGT3 Q53FH6 G3V2S6 G3V126 P01111 C9JEL3 H6WA46 B4DDM0 A0A024RBR1 B4DHK6 Q9UBS0 P31749 D7RF68 P31751 Q01650 Q9BVC4 B4DFV7 P42345 H3BMH3 J3QS66 Q96B36 B4E236 B3KRB7 B4E2D6 Q8TB45 O43156 Q59GT1 P05771 Q8N122 P42338…	under	0.754136	0.82037	0.0149254
map04142	Lysosome	1	128	67	6210	0.78125	1.0789	B4DE67	Q00610 A0A0G2JLK3 P07602 B3KN68 A0A1B0GW44 Q10567 B4DJQ8 P50897 P09496 Q9BVJ8 B4DL49 I3NI22 P07686 B4DTT0 P20645 E9PIF4 O00203 B3KNH5 G3V2V8 P25774 B2R7M1 P61966 Q14108 G3V126 A8K0B6 B2R4I8 O43747 O14617 Q8NDP0 F8VNT9 H0Y9C7 P16278 B7Z4S8 A0A0G2JNZ5 B4E324 B4DE67 C0LQF2 A0A024R7S3 B4DSE2 Q8NBK3 P27449 A0A024R8Q1 E5RJ52 B3KRY3 O75843 Q14769 B3KR70 Q9UJY5 Q5U000 Q59EZ3 P06280 Q9HBQ7 Q9UJY4 Q14427 B…	under	0.754136	0.82037	0.0149254
map04210	Apoptosis	1	128	68	6210	0.78125	1.09501	B3KRB7	B4E335 C9JFR7 P02545 Q13813 P05198 P20700 P68366 Q03252 Q53GA7 Q502X2 B4DHN0 P09874 O95831 Q07812 A0A1B0GW44 A0A024RAV5 A0A024R5A3 B4DJQ8 O00273 Q6LCB0 B1PL87 B4DFY5 B4DL49 Q2TAM5 P36507 B6CGU5 A0A0S2Z3D2 Q9NY65 P25774 A0A0S2Z3I0 P55212 P01111 Q9UKK3 Q59EF6 F8VNZ0 D3DWY0 Q59FG7 P42574 Q14573 A3E0Z5 P31749 B7Z588 Q5U000 P31751 A6NHL2 Q9HBQ7 P19838 B5BUB8 B3KRK7 O43521 B2R9R2 G3V167 Q07820 Q13546 Q…	under	0.759259	0.82037	0.0147059
map04530	Tight junction	1	128	69	6210	0.78125	1.11111	B2RA70	B4E335 O43707 P19105 P35221 P67775 P35579 P12814 B4DDF7 Q14247 P60953 B4DL06 P61586 P67870 P19784 E7EU96 A0A024R233 A8KA83 A0A024RAV5 E9PHY5 P51153 Q9H4G0 E9PK85 Q7Z406 B4DLC3 Q9P2M7 D3DVF0 A0A024RAV4 J3QRV5 P30154 O15551 P01111 P26232 P35580 B2RA70 B3KW38 P08754 Q07157 P12931 H6WA46 Q2VPE5 Q9BUF7 Q92797 P10301 K7EP40 A0A024QYZ6 Q6NX51 P31749 A0A0U1RR46 P31751 P63151 Q05655 Q4VB87 A8MQ02 Q9NYL2 Q…	under	0.764276	0.82037	0.0144928
map05200	Pathways in cancer	2	128	135	6210	1.5625	2.17391	B3KRB7 P63218	E5RHG8 C9JFR7 Q9UBI6 P08238 P07900 P35221 A0A024R1X8 Q5CAQ5 Q2MJK0 B3KR50 A0A024QZJ7 P60953 B4DHN0 B4DL06 A0A024RB10 P63000 P61586 P06753 P62879 B2R6K4 Q07812 P07954 B8ZZU8 P11234 A0A024RAV5 P11233 Q9UH60 P08581 B5BTZ6 P23229 B5BU61 P12270 B0AZR9 Q13363 P46109 Q92888 O75116 Q6LCB0 B1PL87 P17612 Q7Z426 P43246 B4DFY5 P46108 Q00534 P63218 Q2TAM5 P36507 P52701 B6CGU5 P05556 A0A0S2Z3D2 P49841 P01111 P…	under	0.772474	0.821632	0.0148148
map04010	MAPK signaling pathway	1	128	82	6210	0.78125	1.32045	B3KRB7	P11142 Q9UBI6 P0DMV9 O75369 B5BU83 Q13177 B3KR50 P62834 P60953 B4DHN0 P21333 Q13153 P63000 P04792 P46734 A0A024RAV5 B5BUD5 P51812 Q9BPW0 E9PK85 P46109 P34931 P54652 P17612 B4DFY5 P46108 B5BU16 Q2TAM5 P36507 E9PGT3 Q53FH6 B3KSM6 B2R6X5 K7ES89 P01111 B5BTY5 K7EPL5 P22694 B4DH44 A8K103 B4E0K5 D3DWY0 Q59FG7 P42574 C9J8E1 B3KP90 P10301 Q8TAX8 E7BSV0 F8VZA4 Q15750 P49137 Q13043 P31749 D7RF68 P31751 Q13…	under	0.82079	0.865157	0.0121951
map05203	Viral carcinogenesis	1	128	96	6210	0.78125	1.54589	A8YQF4	P62258 P14618 A0A024R5Z9 P63104 P27348 O43707 A0A024QZP7 Q04917 P06899 A8K9J7 P31946 P62805 B4DUQ1 A0A0D9SFB3 P62191 P61981 Q9Y277 P12814 Q2MJK0 B3KR50 P60953 B4DHN0 A0A024RB10 Q96A08 P43487 A0A0S4XQV4 P63000 P61586 B2R5U1 B4E299 Q16531 Q07812 A0A024RAV5 Q9UH60 B5BTZ6 Q93009 B5BU61 Q00403 A0A024R6E3 Q05086 P29084 P17612 B7ZKK7 Q9Y676 Q00534 Q2TAM5 B6CGU5 B7Z992 A8YQF4 B2R7M1 A0A0G2JHJ2 P01111 F5G…	under	0.866685	0.903083	0.0104167
map00190	Oxidative phosphorylation	1	128	98	6210	0.78125	1.5781	P09669	A0A059S4M9 O75947 P14854 Q15181 P56385 Q14061 O14949 P14927 P18859 Q9UDW1 O95167 O43678 A0A096WXL7 P22695 O00483 P06576 P13073 P25705 P31930 P38606 E9PN17 A0A087WZX2 Q16864 O75489 P48047 P10606 Q567R0 P21283 P31040 Q5QNZ2 B4DL14 F8WAS3 H3BPJ9 P36543 P21281 O75380 O75438 D6R9Z7 P17568 Q9UI09 P21912 O75348 O95298 O95168 Q9BTT5 Q9H2U2 P56381 P28331 O43920 B4DEZ3 P47985 P14406 R4GN43 O75306 Q14WI3 P5…	under	0.872209	0.903083	0.0102041
map05010	Alzheimer's disease	1	128	105	6210	0.78125	1.69082	P09669	Q99714 A0A059S4M9 O75947 P14854 C9JFR7 P04406 Q2TSD0 O14949 P14927 P18859 Q9UDW1 O95167 O43678 B2RDW0 A0A096WXL7 P22695 O00483 P06576 P13073 P25705 P31930 Q6IPN0 A0A087WZX2 B4DHN0 O75489 P48047 P10606 Q567R0 P31040 Q5QNZ2 B4DL14 F8WAS3 H3BPJ9 A6XGP7 O75380 O75438 D6R9Z7 P17568 Q9UI09 P21912 P16615 O95298 O95168 A0A024R5A3 Q9BTT5 P56381 P28331 O43920 O14672 P14735 B4DEZ3 P47985 P14406 R4GN43 O7530…	under	0.889814	0.91323	0.00952381
map05016	Huntington's disease	1	128	121	6210	0.78125	1.94847	P09669	A0A059S4M9 O75947 P14854 C9JFR7 P21796 O14949 P14927 P00441 P18859 Q9UDW1 O95167 O43678 A0A096WXL7 Q9Y277 P22695 P45880 O00483 P06576 Q00610 P13073 P05141 P25705 P12236 P31930 A8K787 A0A087WZX2 C9JLU1 O75489 P48047 P10606 Q13561 Q567R0 P31040 Q5QNZ2 B4DL14 F8WAS3 A0A087WVZ9 H3BPJ9 A0A087WY71 Q07812 O75380 O75438 A0A0C4DFU1 D6R9Z7 P17568 H0UID5 Q9UI09 P21912 O95298 O95168 Q9BTT5 P62875 P56381 P283…	under	0.92153	0.935924	0.00826446
map03013	RNA transport	1	128	125	6210	0.78125	2.01288	Q6IAM0	H3BPC4 P05198 P61326 Q9Y3F4 P20042 P55010 Q14232 A8K7F6 Q14240 Q9BRP8 O15372 P68104 P41091 Q13347 A8K897 P62826 Q13838 P78346 P38919 P41567 A0A024R7L5 B4DV79 B4DMT5 O00422 B2RBR9 J9R021 H0Y3P2 P46060 K7ESH8 E7EUU4 P60228 O75822 A0A076L8Z0 Q6IQ30 B4DEP6 A0A0F7L0Q8 Q9Y5S9 O14980 E9PB61 P78406 Q9UKX7 P06730 A8K3Z5 Q05639 B2RDD7 Q9NR50 P12270 A8KA19 Q7L576 Q6IAM0 P49792 Q86W42 E9PMI6 P47813 A0A087WUT…	under	0.927924	0.935924	0.008
map04144	Endocytosis	1	128	145	6210	0.78125	2.33494	A8YQF4	P51149 P61026 Q15907 P51148 P11142 B1AK87 O15511 P20339 P47755 P0DMV9 Q4W4Y1 P02786 P61204 Q00610 P33176 P61006 P61020 P62330 P60953 A0A0S4XQV4 Q9UK41 P61586 Q9BY43 P52907 O15144 Q3SYF1 A0A087WY71 Q9H444 Q9BPX5 Q03135 Q9UBQ0 Q59GU6 B3KML1 P59998 A8K885 H0UID5 A8K4G7 F5H157 A8K5S3 P08581 B2R4D5 P51636 P50570 Q9UN37 Q9UQD4 Q96QK1 Q9NR46 P34931 O60493 Q8TF74 O95782 P54652 P09496 O75436 P53680 Q9BRG1…	under	0.95292	0.95292	0.00689655
